# Supplementary material for: The catalytic effect of water, water dimers and water trimers on H2S +3O2formation by the HO2+ HS reaction under tropospheric conditions
Source: Royal Society of Chemistry journal article supplement (doi:10.1039/c6cp00654j), 2016-01-01
Supplement: c6cp00654j1.pdf [file c6cp00654j1.pdf]

## Supporting information

-for-

### Catalytic effect of water, water dimer and water trimer on the $\text{H}_2\text{S}$ $+^3\text{O}_2$ formations from the $\text{HO}_2 + \text{HS}$ reaction in tropospheric conditions†

Tianlei Zhang<sup>a,\*</sup>, Chen Yang<sup>a</sup>, Xukai Feng<sup>a</sup>, Jiaxin Kang<sup>a</sup>, Liang Song<sup>a</sup>, Yousong Lu<sup>a</sup>,  
Zhiyin Wang<sup>a</sup>, Qiong Xu<sup>a</sup>, Wenliang Wang<sup>b</sup>, Zhuqing Wang<sup>c,\*</sup>

<sup>a</sup> Shaanxi Province Key Laboratory of Catalytic Fundamental & Application, School of Chemical & Environment Science, Shaanxi University of Technology, Hanzhong, Shaanxi 723001, China

<sup>b</sup> Key Laboratory for Macromolecular Science of Shaanxi Province, School of Chemistry & Chemical Engineering, Shaanxi Normal University, Xi'an, Shaanxi 710062, China

<sup>c</sup> Shandong Provincial Key Laboratory of Ocean Environment Monitoring Technology, Shandong Academy of Sciences Institute of Oceanographic Instrumentation, Qingdao 266001, China.

|               |                                                                                                                                                                                                  |
|---------------|--------------------------------------------------------------------------------------------------------------------------------------------------------------------------------------------------|
| <b>Part A</b> | <b>The channel of <math>\text{H}_2\text{S} + ^3\text{O}_2</math> formations from the <math>\text{HO}_2</math><br/>+ HS without catalyst (pS2-pS7)</b>                                            |
| <b>Part B</b> | <b>The channel of <math>\text{H}_2\text{S} + ^3\text{O}_2</math> formations from the <math>\text{HO}_2</math><br/>+ HS with catalyst X (<math>X = \text{H}_2\text{O}</math>) (pS8-pS13)</b>      |
| <b>Part C</b> | <b>The channel of <math>\text{H}_2\text{S} + ^3\text{O}_2</math> formations from the <math>\text{HO}_2 +</math><br/>HS with catalyst X (<math>X = (\text{H}_2\text{O})_2</math>) (pS14-pS23)</b> |
| <b>Part D</b> | <b>The channel of <math>\text{H}_2\text{S} + ^3\text{O}_2</math> formations from the <math>\text{HO}_2</math><br/>+ HS with catalyst X (<math>X = (\text{H}_2\text{O})_3</math>) (pS24-pS29)</b> |

**Part A                    The H<sub>2</sub>S +<sup>3</sup>O<sub>2</sub> formations from the HO<sub>2</sub>+ HS without catalyst(pS2-pS7)**

|                  |                                                                                                                                                                                                                                                                                                                |            |
|------------------|----------------------------------------------------------------------------------------------------------------------------------------------------------------------------------------------------------------------------------------------------------------------------------------------------------------|------------|
| <b>Figure S1</b> | Geometrical parameters for the naked reaction of HO <sub>2</sub> + HS optimized at the CCSD(T)/6-311++G(3df, 2pd)//B3LYP/6-311+G(2df, 2p) level of theory                                                                                                                                                      | <b>pS3</b> |
| <b>Table S1</b>  | Zero point energy (ZPE/(kcal·mol <sup>-1</sup> )), relative energies ( $\Delta E$ and $\Delta(E+ZPE)$ /(kcal·mol <sup>-1</sup> )), enthalpies ( $\Delta H(298)$ /(kcal·mol <sup>-1</sup> )), and free energies ( $\Delta G(298)$ /(kcal·mol <sup>-1</sup> )) for the HO <sub>2</sub> +HS reaction <sup>a</sup> | <b>pS4</b> |
| <b>Figure S2</b> | Schematic energy diagram of the naked HO <sub>2</sub> +HS reaction energies                                                                                                                                                                                                                                    | <b>pS5</b> |
| <b>Table S2</b>  | Rate constants (cm <sup>3</sup> ·molecules <sup>-1</sup> ·s <sup>-1</sup> ) for main reaction of the HO <sub>2</sub> + HS reaction within the temperature range of 240.0-425.0 K                                                                                                                               | <b>pS6</b> |
|                  | The predicated concentration of HS based on previous experimental and theoretical reports at 298 K                                                                                                                                                                                                             | <b>pS7</b> |

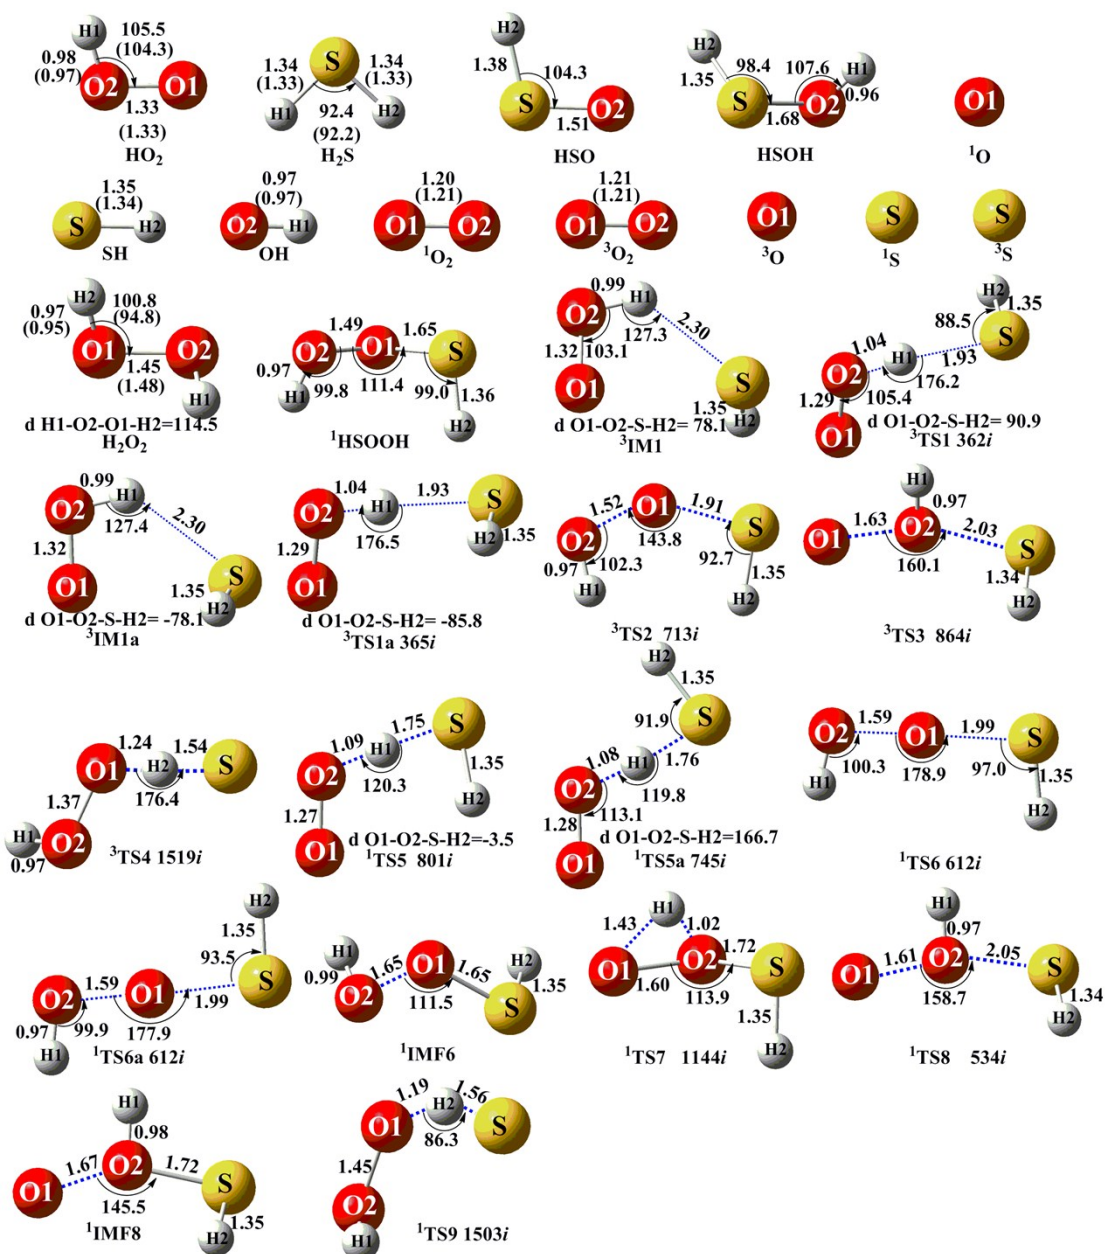

Figure S1 Geometrical parameters for the naked reaction of HO<sub>2</sub> + HS optimized at the CCSD(T)/6-311++G(3df,2pd)//B3LYP/6-311+G(2df,2p) level of theory

**Table S1** Zero point energy (ZPE/(kcal·mol<sup>-1</sup>)), relative energies ( $\Delta E$  and  $\Delta(E+ZPE)$ /(kcal·mol<sup>-1</sup>)), enthalpies ( $\Delta H(298)$ /(kcal·mol<sup>-1</sup>)), and free energies ( $\Delta G(298)$ /(kcal·mol<sup>-1</sup>)) for the HO<sub>2</sub> + HS reaction<sup>a</sup>

| Species                                        | ZPE  | S     | $\Delta E$ | $\Delta H(298)$ | $\Delta G(298)$ | $\Delta(E+ZPE)$ |
|------------------------------------------------|------|-------|------------|-----------------|-----------------|-----------------|
| HO <sub>2</sub> + HS                           | 12.7 | 100.6 | 0.0        | 0.0             | 0.0             | 0.0             |
| <sup>3</sup> IM1                               | 14.4 | 73.8  | -4.7       | -3.6            | 4.4             | -3.0            |
| <sup>3</sup> IM1a                              | 14.4 | 73.8  | -4.7       | -3.6            | 4.4             | -3.0            |
| <sup>3</sup> TS1                               | 12.0 | 74.1  | -0.5       | -2.0            | 5.9             | -1.2            |
| <sup>3</sup> TS1a                              | 12.0 | 74.2  | -0.5       | -2.0            | 5.9             | -1.2            |
| H <sub>2</sub> S + <sup>3</sup> O <sub>2</sub> | 11.8 | 99.5  | -40.9      | -41.8           | -41.5           | -41.8           |
| <sup>3</sup> TS2                               | 13.9 | 69.4  | 13.5       | 13.6            | 22.9            | 14.6            |
| HSO + OH                                       | 11.8 | 100.3 | -30.6      | -31.5           | -31.4           | -31.5           |
| <sup>3</sup> TS3                               | 13.4 | 70.8  | 26.4       | 26.2            | 35.1            | 27.1            |
| HSOH + <sup>3</sup> O                          | 14.1 | 94.7  | -5.8       | -4.8            | -3.1            | -4.4            |
| <sup>3</sup> TS4                               | 12.4 | 69.9  | 25.2       | 23.7            | 32.8            | 24.9            |
| H <sub>2</sub> O <sub>2</sub> + <sup>3</sup> S | 16.7 | 92.0  | -16.2      | -12.5           | -10.6           | -12.2           |
| <sup>1</sup> TS5                               | 12.3 | 68.0  | 12.1       | 10.7            | 20.4            | 11.7            |
| <sup>1</sup> TS5a                              | 12.3 | 68.0  | 12.2       | 10.8            | 20.5            | 11.8            |
| H <sub>2</sub> S + <sup>1</sup> O <sub>2</sub> | 11.7 | 97.3  | -10.6      | -11.6           | -10.6           | -11.6           |
| <sup>1</sup> TS6                               | 13.3 | 69.1  | 35.8       | 0.1             | 35.3            | 44.7            |
| <sup>1</sup> TS6a                              | 15.4 | 64.9  | 35.5       | 4.1             | 36.9            | 47.5            |
| <sup>1</sup> IMF6                              | 17.5 | 76.0  | -46.7      | -43.7           | -33.3           | -45.1           |
| HSO + OH                                       | 11.7 | 100.3 | -30.6      | -1.9            | -31.5           | -31.5           |
| <sup>1</sup> TS7                               | 13.4 | 66.8  | 13.7       | 13.3            | 23.3            | 14.4            |
| <sup>1</sup> HSOOH                             | 15.9 | 66.4  | -44.4      | -42.4           | -32.2           | -41.3           |
| <sup>1</sup> TS8                               | 13.4 | 70.8  | 34.6       | 34.8            | 44.7            | 35.9            |
| HSOH + <sup>1</sup> O                          | 14.1 | 92.5  | 45.4       | 46.4            | 48.8            | 46.8            |
| <sup>1</sup> TS9                               | 14.1 | 66.0  | -21.5      | -22.6           | -13.2           | 33.6            |
| H <sub>2</sub> O <sub>2</sub> + <sup>1</sup> S | 16.7 | 92.0  | 15.0       | 18.6            | 21.1            | 18.9            |

<sup>a</sup> ZPE and S values obtained at B3LYP/6-311+G(2df,2p) level of theory; The energy values are obtained at CCSD(T)/ 6-311++G(3df,2pd) level whereas the *H* and *G* corrections are taken from the B3LYP/6-311+G(2df,2p) level.

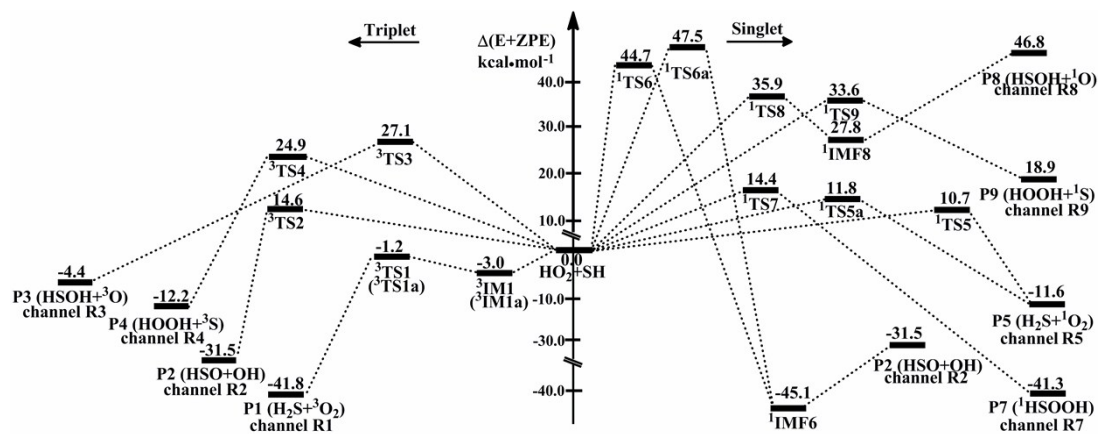

**Figure S2** Schematic energy diagram of the naked HO<sub>2</sub> + HS reaction energies (kcal·mol<sup>-1</sup>) computed at the CCSD(T)/6-311++G(3df,2pd)//B3LYP/6-311+G(2df,2p) level include zero-point energy correction.

**Table S2** Rate constants ( $\text{cm}^3 \cdot \text{molecules}^{-1} \cdot \text{s}^{-1}$ ) for main reaction of the  $\text{HO}_2 + \text{HS}$  reaction within the temperature range of 240.0-425.0 K

| $T/\text{K}$ | $k_{\text{R1a}}$ | $k_{\text{R1b}}$ | $k_{\text{R1}}$ |
|--------------|------------------|------------------|-----------------|
| 240          | 2.60E-11         | 2.90E-11         | 5.49E-11        |
| 250          | 2.35E-11         | 2.62E-11         | 4.98E-11        |
| 278          | 1.88E-11         | 2.09E-11         | 3.97E-11        |
| 288          | 1.76E-11         | 1.95E-11         | 3.72E-11        |
| 298          | 1.66E-11         | 1.84E-11         | 3.50E-11        |
| 308          | 1.58E-11         | 1.74E-11         | 3.32E-11        |
| 325          | 1.46E-11         | 1.61E-11         | 3.07E-11        |
| 375          | 1.24E-11         | 1.36E-11         | 2.60E-11        |
| 425          | 1.13E-11         | 1.24E-11         | 2.37E-11        |

$k_{\text{R1}}$  is the rate constant of Channel R1;  $k_{\text{R1a}}$  is the rate constant of the process of  $\text{HO}_2 + \text{HS} \rightarrow {}^3\text{IM1} \rightarrow {}^3\text{TS1} \rightarrow \text{H}_2\text{S} + {}^3\text{O}_2$ ; and  $k_{\text{R1b}}$  is the rate constant of the process of  $\text{HO}_2 + \text{HS} \rightarrow {}^3\text{IM1a} \rightarrow {}^3\text{TS1} \rightarrow \text{H}_2\text{S} + {}^3\text{O}_2$ ;  $k_{\text{R1}} = k_{\text{R1a}} + k_{\text{R1b}}$

## The predicated concentration of HS based on previous experimental and theoretical reports at 298 K

The main source of HS radical is the reaction of H<sub>2</sub>S with OH radical<sup>[1]</sup>:

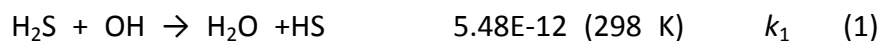

The formed HS radical is mainly dispelled by the reacts with atoms or molecules, such as HO<sub>2</sub><sup>[2]</sup>, O<sub>3</sub><sup>[3]</sup>, O<sub>2</sub><sup>[4]</sup>, NO<sup>[5]</sup>, NO<sub>2</sub><sup>[6]</sup> :

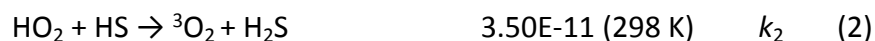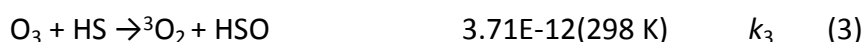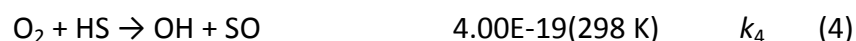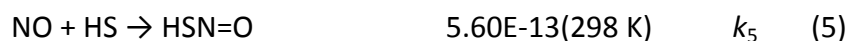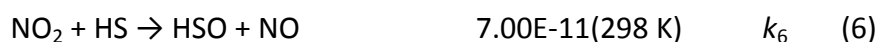

Assumed that the production rate and the depletion rate is comparable, the concentration of HS radical can be approximately equal to:

$$[\text{HS}] = (k_1[\text{H}_2\text{S}][\text{OH}]) / (k_2[\text{HO}_2] + k_3[\text{O}_3] + k_4[\text{O}_2] + k_5[\text{NO}] + k_6[\text{NO}_2])$$

where  $k_1$ ,  $k_2$ ,  $k_3$ ,  $k_4$ ,  $k_5$  and  $k_6$  are rate constants for the reactions of R1, R2, R3, R4, R5 and R6, respectively. Therefore, the concentration of HS radical is calculated as a value of **10<sup>6</sup> molecules cm<sup>-3</sup>** in the tropospheric conditon with 20% O<sub>2</sub>, 10 ppbv O<sub>3</sub>, 10ppbv NO, 10ppbv NO<sub>2</sub>, 10pptv HO<sub>2</sub>, 1pptv OH and 10ppbv H<sub>2</sub>S.

### References

- [1] G. S. Tyndall and A. R. Ravishankara, *Atmos. Environ.*, 1991, **23**, 483-527.
- [2] R. A. Stachnik and M. J. Molina, *J. Phys. Chem.*, 1987, **91**, 4603-4606.
- [3] R. R. Friedl, W. H. Brune and J. G. Anderson, *J. Phys. Chem.*, 1985, **89**, 5505-5510.
- [4] D. J. Nesbitt and S. R. Leone, *J. Chem. Phys.*, 1980, **72**, 1722-1732.
- [5] G. Black, *J. Chem. Phys.*, 1984, **80**, 1103-1107.
- [6] R. Atkinson, D. L. Baulch, R. A. Cox, J. N. Crowley, R. F. Hampson, R. G. Hynes, M. E. Jenkin, M. J. Rossi and J. Troe, *Atmos. Chem. Phys.*, 2004, **4**, 1461-1738.

**Part B The  $\text{H}_2\text{S} + {}^3\text{O}_2$  formations from the  $\text{HO}_2 + \text{HS}$  with catalyst  $X$  ( $X = \text{H}_2\text{O}$ ) (pS8-pS13)**

|                  |                                                                                                                                                                                                                                                                                                                                                                                                                                                                                                                                                                                                                                |                   |
|------------------|--------------------------------------------------------------------------------------------------------------------------------------------------------------------------------------------------------------------------------------------------------------------------------------------------------------------------------------------------------------------------------------------------------------------------------------------------------------------------------------------------------------------------------------------------------------------------------------------------------------------------------|-------------------|
| <b>Figure S3</b> | The geometrical structures of the optimized transitions state, intermediates, and complexes involved in water-assisted Channels occurring through $\text{H}_2\text{O}\cdots\text{HO}_2 + \text{HS}$ , $\text{HO}_2\cdots\text{H}_2\text{O} + \text{HS}$ , $\text{HS}\cdots\text{H}_2\text{O} + \text{HO}_2$ and $\text{H}_2\text{O}\cdots\text{HS} + \text{HO}_2$ reactants                                                                                                                                                                                                                                                    | <b>pS9</b>        |
| <b>Table S3</b>  | Zero point energy ( $\text{ZPE}/(\text{kcal}\cdot\text{mol}^{-1})$ ), entropies ( $S/(\text{cal}\cdot\text{mol}^{-1}\cdot\text{K}^{-1})$ ), relative energies ( $\Delta E$ and $\Delta(E+\text{ZPE})/(\text{kcal}\cdot\text{mol}^{-1})$ ), enthalpies ( $\Delta H(298)/(\text{kcal}\cdot\text{mol}^{-1})$ ), and free energies ( $\Delta G(298)/(\text{kcal}\cdot\text{mol}^{-1})$ ) for the binary complexes ( $\text{H}_2\text{O}\cdots\text{HO}_2$ , $\text{HO}_2\cdots\text{H}_2\text{O}$ , $\text{HS}\cdots\text{H}_2\text{O}$ , $\text{HS}\cdots\text{H}_2\text{O}$ , and $\text{H}_2\text{O}\cdots\text{H}_2\text{O}$ ) | <b>pS10</b>       |
| <b>Table S4</b>  | Zero point energy ( $\text{ZPE}/(\text{kcal}\cdot\text{mol}^{-1})$ ), relative energies ( $\Delta E$ and $\Delta(E+\text{ZPE})/(\text{kcal}\cdot\text{mol}^{-1})$ ), enthalpies ( $\Delta H(298)/(\text{kcal}\cdot\text{mol}^{-1})$ ), and free energies ( $\Delta G(298)/(\text{kcal}\cdot\text{mol}^{-1})$ ) for water-assisted the formations of $\text{H}_2\text{S} + {}^3\text{O}_2$ from the $\text{HO}_2 + \text{HS}$ reaction                                                                                                                                                                                          | <b>pS11</b>       |
| <b>Table S5</b>  | Rate constants ( $\text{cm}^3\cdot\text{molecules}^{-1}\cdot\text{s}^{-1}$ ) for the $\text{H}_2\text{S} + {}^3\text{O}_2$ formations from the $\text{HO}_2 + \text{HS}$ reaction occurring through water-assisted Channels RW1a, RW1b, RW2 and RW3 within the temperature range of 240.0-425.0 K                                                                                                                                                                                                                                                                                                                              | <b>pS (12-13)</b> |



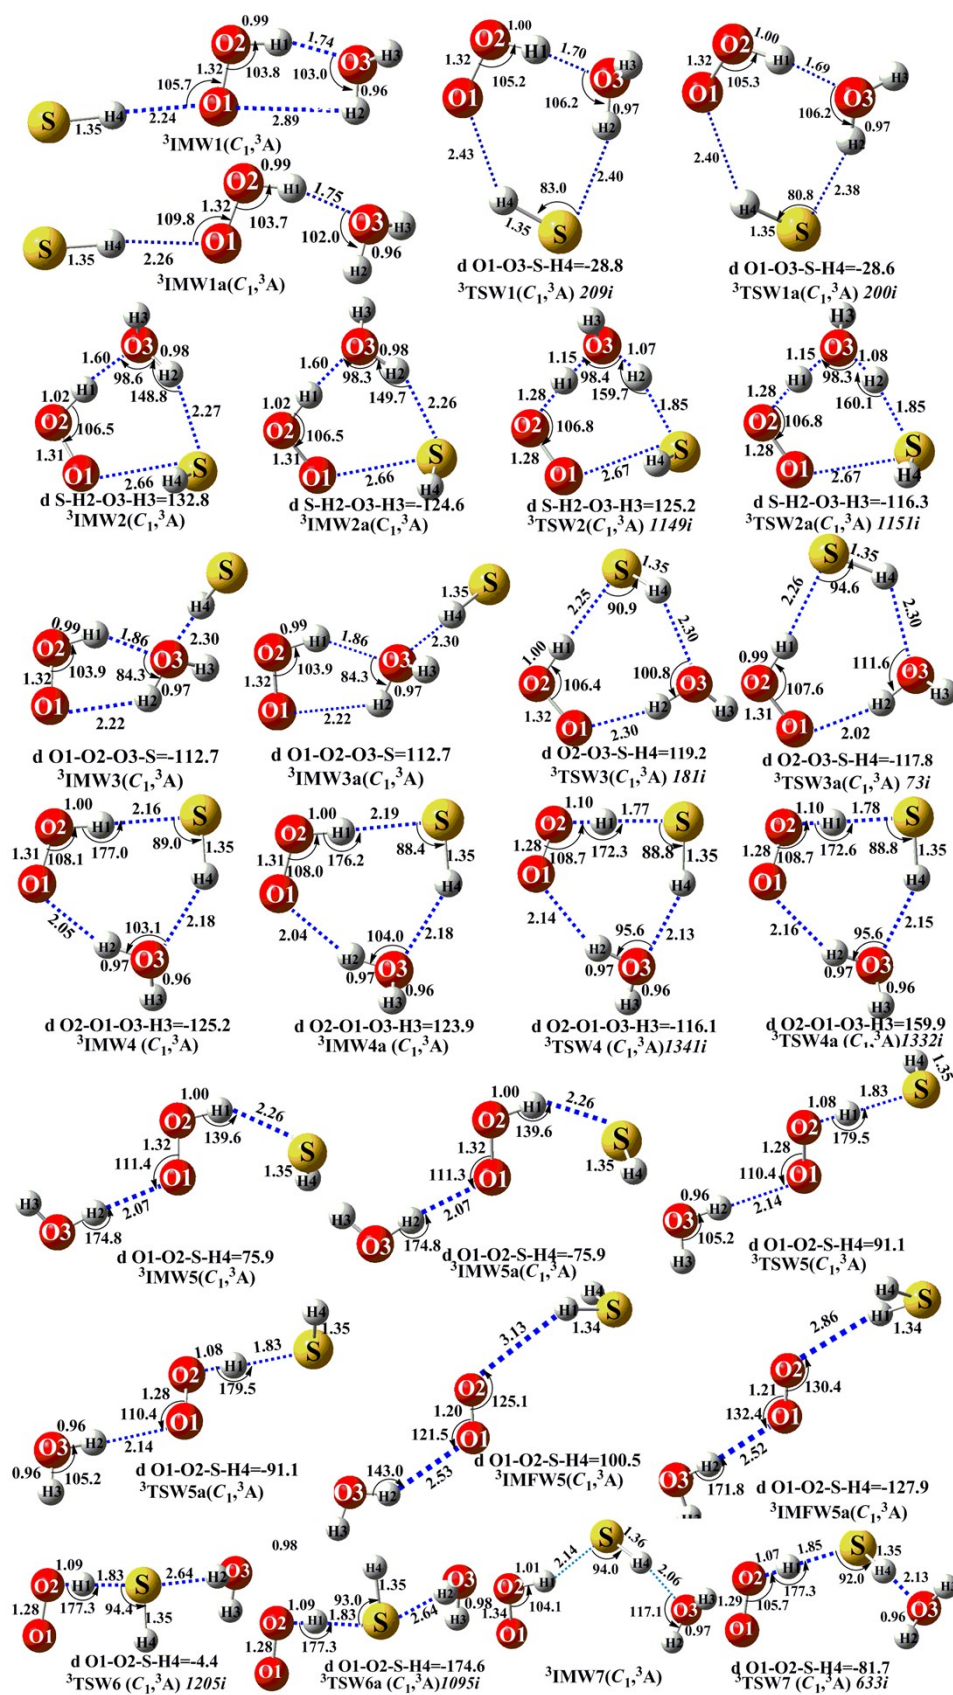

**Figure S3** The geometrical structures of the optimized transition state, intermediates, and complexes involved in water-assisted channels occurring through  $\text{H}_2\text{O}\cdots\text{HO}_2 + \text{HS}$ ,  $\text{HO}_2\cdots\text{H}_2\text{O} + \text{HS}$ ,  $\text{HS}\cdots\text{H}_2\text{O} + \text{HO}_2$  and  $\text{H}_2\text{O}\cdots\text{HS} + \text{HO}_2$  reactants

**Table S3** Zero point energy (ZPE/(kcal·mol<sup>-1</sup>)), entropies (S/ (cal·mol<sup>-1</sup>·K<sup>-1</sup>)), relative energies ( $\Delta E$  and  $\Delta(E+ZPE)$ /(kcal·mol<sup>-1</sup>)), enthalpies ( $\Delta H(298)$ /(kcal·mol<sup>-1</sup>)), and free energies ( $\Delta G(298)$ /(kcal·mol<sup>-1</sup>)) for the binary complexes (H<sub>2</sub>O···HO<sub>2</sub>, HO<sub>2</sub>···H<sub>2</sub>O, HS···H<sub>2</sub>O, HS···H<sub>2</sub>O, and H<sub>2</sub>O···H<sub>2</sub>O)

| Species                             | ZPE  | S    | $\Delta E$ | $\Delta H$ | $\Delta G$ | $\Delta(E+ZPE)$ |
|-------------------------------------|------|------|------------|------------|------------|-----------------|
| H <sub>2</sub> O + HO <sub>2</sub>  | 22.3 | 99.7 | 0.0        | 0.0        | 0.0        | 0.0             |
| H <sub>2</sub> O···HO <sub>2</sub>  | 24.8 | 72.6 | -9.4       | -7.6       | 0.5        | -6.9            |
| HO <sub>2</sub> ···H <sub>2</sub> O | 23.9 | 80.0 | -3.5       | -2.0       | 3.9        | -1.9            |
| H <sub>2</sub> O + HS               | 17.2 | 91.0 | 0.0        | 0.0        | 0.0        | 0.0             |
| H <sub>2</sub> O···HS               | 18.6 | 72.7 | -3.0       | -1.9       | 3.6        | -1.6            |
| HS···H <sub>2</sub> O               | 18.2 | 75.9 | -2.7       | -1.8       | 2.7        | -1.7            |

<sup>a</sup> ZPE and S values obtained at B3LYP/6-311+G(2df,2p) level of theory; The energy values are obtained at CCSD(T)/6-311++G(3df,2pd) level whereas the *H* and *G* corrections are taken from the B3LYP/6-311+G(2df,2p) level.

**Table S4** Zero point energy (ZPE/(kcal·mol<sup>-1</sup>)), relative energies ( $\Delta E$  and  $\Delta(E+ZPE)$ /(kcal·mol<sup>-1</sup>)), enthalpies ( $\Delta H(298)$ /(kcal·mol<sup>-1</sup>)), and free energies ( $\Delta G(298)$ /(kcal·mol<sup>-1</sup>)) for water-assisted the formation of H<sub>2</sub>S + <sup>3</sup>O<sub>2</sub> from the HO<sub>2</sub> + HS reaction<sup>a</sup>

| Species                                                           | ZPE  | $\Delta E$ | $\Delta H(298)$ | $\Delta G(298)$ | $\Delta(E+ZPE)$ |
|-------------------------------------------------------------------|------|------------|-----------------|-----------------|-----------------|
| H <sub>2</sub> O•••HO <sub>2</sub> + HS                           | 28.6 | 0.0        | 0.0             | 0.0             | 0.0             |
| <sup>3</sup> IMW1                                                 | 29.5 | -3.4       | -4.4            | 1.1             | -2.6            |
| <sup>3</sup> IMW1a                                                | 29.5 | -3.4       | -4.5            | 1.3             | -2.6            |
| <sup>3</sup> TSW1                                                 | 29.6 | -3.3       | -5.0            | 3.8             | -2.3            |
| <sup>3</sup> TSW1a                                                | 29.6 | -3.2       | -4.9            | 3.9             | -2.2            |
| <sup>3</sup> IMW2                                                 | 30.4 | 4.4        | -4.1            | 5.7             | -3.3            |
| <sup>3</sup> IMW2a                                                | 30.4 | 4.3        | -4.2            | 5.6             | -3.4            |
| <sup>3</sup> TSW2                                                 | 27.3 | 17.1       | 4.7             | 16.3            | 6.3             |
| <sup>3</sup> TSW2a                                                | 27.3 | 17.0       | 4.6             | 16.1            | 6.2             |
| <sup>3</sup> IMW3                                                 | 29.7 | -3.8       | -2.7            | 3.3             | -2.7            |
| <sup>3</sup> IMW3a                                                | 29.7 | -3.8       | 36.9            | 3.3             | -2.7            |
| <sup>3</sup> TSW3                                                 | 29.3 | -3.2       | -37.9           | 5.5             | -2.5            |
| <sup>3</sup> TSW3a                                                | 28.6 | -2.4       | -2.7            | 5.1             | -2.4            |
| <sup>3</sup> IMW4                                                 | 28.6 | -2.9       | -2.9            | 4.0             | -3.0            |
| <sup>3</sup> IMW4a                                                | 28.6 | -3.0       | -2.9            | 3.9             | -3.0            |
| <sup>3</sup> TSW4                                                 | 26.1 | 5.7        | 2.5             | 11.2            | 3.1             |
| <sup>3</sup> TSW4a                                                | 25.9 | 5.7        | 2.5             | 10.7            | 2.9             |
| H <sub>2</sub> O•••H <sub>2</sub> S + <sup>3</sup> O <sub>2</sub> | 26.5 | -34.2      | -35.6           | -37.8           | -36.3           |
| HO <sub>2</sub> •••H <sub>2</sub> O + HS                          | 28.4 | 0.0        | 0.0             | 0.0             | 0.0             |
| <sup>3</sup> IMW5                                                 | 28.8 | -6.9       | -5.9            | -1.3            | -4.1            |
| <sup>3</sup> IMW5a                                                | 28.8 | -6.9       | -5.9            | -1.2            | -4.2            |
| <sup>3</sup> TSW5                                                 | 25.6 | 0.5        | -2.0            | 3.3             | 0.0             |
| <sup>3</sup> TSW5a                                                | 25.6 | 0.5        | -2.0            | 3.3             | -0.1            |
| <sup>3</sup> IMFW5                                                | 26.0 | -40.1      | -40.3           | -43.6           | -40.3           |
| <sup>3</sup> IMFW5a                                               | 27.1 | -39.6      | -39.7           | -38.1           | -40.6           |
| H <sub>2</sub> O+ <sup>3</sup> O <sub>2</sub> + H <sub>2</sub> S  | 25.2 | -38.8      | -41.2           | -49.1           | -39.8           |
| HO <sub>2</sub> + HS•••H <sub>2</sub> O                           | 27.1 | 0.0        | 0.0             | 0.0             | 0.0             |
| <sup>3</sup> TSW6                                                 | 26.2 | 6.1        | 2.7             | 14.7            | 5.1             |
| <sup>3</sup> TSW6a                                                | 26.0 | 6.5        | 4.1             | 15.7            | 5.5             |
| H <sub>2</sub> S•••H <sub>2</sub> O + <sup>3</sup> O <sub>2</sub> | 27.3 | -40.5      | -41.0           | -37.7           | -40.3           |
| H <sub>2</sub> O•••HS + HO <sub>2</sub>                           | 27.5 | 0.0        | 0.0             | 0.0             | 0.0             |
| <sup>3</sup> IMW7                                                 | 29.6 | -10.3      | -8.9            | 1.8             | -8.2            |
| <sup>3</sup> TSW7                                                 | 25.9 | -0.2       | -2.7            | 7.5             | -1.8            |
| H <sub>2</sub> O•••H <sub>2</sub> S + <sup>3</sup> O <sub>2</sub> | 26.5 | -40.7      | -41.4           | -40.9           | -41.6           |

<sup>a</sup> ZPE values obtained at B3LYP/6-311+G(2df,2p) level of theory; The energy values are obtained at CCSD(T)/6-311++G(3df,2pd) level whereas the *H* and *G* corrections are taken from the B3LYP/6-311+G(2df,2p) level.

**Table S5** Rate constants ( $\text{cm}^3 \cdot \text{molecules}^{-1} \cdot \text{s}^{-1}$ ) for the  $\text{H}_2\text{S} + {}^3\text{O}_2$  formations from the  $\text{HO}_2 + \text{HS}$  reaction occurring through water-assisted Channels RW1a, RW1b, RW2 and RW3 within the temperature range of 240.0-425.0 K

| $T/\text{K}$ | Keq(IMW1)         | Keq(IMW1a)         | $k_{\text{TSW1}}$ | $k_{\text{TSW1a}}$ | $k_{\text{TSW2}}$ | $k_{\text{TSW2a}}$ | $k_{\text{RW1a}}$ |
|--------------|-------------------|--------------------|-------------------|--------------------|-------------------|--------------------|-------------------|
| 240          | 4.51E-24          | 4.51E-24           | 2.88E-18          | 2.49E-18           | 2.53E+04          | 3.77E+04           | 5.37E-18          |
| 250          | 5.11E-24          | 5.11E-24           | 3.29E-18          | 3.09E-18           | 4.32E+04          | 6.38E+04           | 6.38E-18          |
| 278          | 7.14E-24          | 7.14E-24           | 4.68E-18          | 5.37E-18           | 1.73E+05          | 2.49E+05           | 1.01E-17          |
| 288          | 8.00E-24          | 8.00E-24           | 5.27E-18          | 6.44E-18           | 2.73E+05          | 3.88E+05           | 1.17E-17          |
| 298          | 8.93E-24          | 8.93E-24           | 5.91E-18          | 7.66E-18           | 4.21E+05          | 5.93E+05           | 1.36E-17          |
| 308          | 9.95E-24          | 9.95E-24           | 6.60E-18          | 9.05E-18           | 6.35E+05          | 8.88E+05           | 1.57E-17          |
| 325          | 1.19E-23          | 1.19E-23           | 7.93E-18          | 1.19E-17           | 1.22E+06          | 1.69E+06           | 1.98E-17          |
| 375          | 1.92E-23          | 1.92E-23           | 1.29E-17          | 2.41E-17           | 6.26E+06          | 8.37E+06           | 3.70E-17          |
| 425          | 2.96E-23          | 2.96E-23           | 2.00E-17          | 4.43E-17           | 2.27E+07          | 2.97E+07           | 6.43E-17          |
| $T/\text{K}$ | Keq(IMW3)         | Keq(IMW3a)         | $k_{\text{TSW3}}$ | $k_{\text{TSW3a}}$ | $k_{\text{TSW4}}$ | $k_{\text{TSW4a}}$ | $k_{\text{RW1b}}$ |
| 240          | 6.51E-12          | 2.27E-13           | 3.44E-08          | 2.00E-08           | 1.44E+12          | 1.74E+12           | 5.44E-08          |
| 250          | 1.87E-12          | 6.93E-14           | 2.01E-08          | 1.16E-08           | 1.45E+12          | 1.80E+12           | 3.17E-08          |
| 278          | 9.79E-14          | 4.18E-15           | 5.90E-09          | 3.32E-09           | 1.47E+12          | 1.97E+12           | 9.22E-09          |
| 288          | 4.02E-14          | 1.78E-15           | 4.13E-09          | 2.30E-09           | 1.48E+12          | 2.02E+12           | 6.43E-09          |
| 298          | 1.77E-14          | 8.19E-16           | 2.99E-09          | 1.66E-09           | 1.49E+12          | 2.07E+12           | 4.65E-09          |
| 308          | 8.28E-15          | 3.98E-16           | 2.23E-09          | 1.23E-09           | 1.50E+12          | 2.11E+12           | 3.46E-09          |
| 325          | 2.59E-15          | 1.31E-16           | 1.44E-09          | 7.85E-10           | 1.51E+12          | 2.18E+12           | 2.23E-09          |
| 375          | 1.70E-16          | 9.81E-18           | 5.47E-10          | 2.91E-10           | 1.54E+12          | 2.35E+12           | 8.38E-10          |
| 425          | 2.32E-17          | 1.48E-18           | 2.86E-10          | 1.50E-10           | 1.57E+12          | 2.47E+12           | 4.36E-10          |
| $T/\text{K}$ | $k_{\text{TSW5}}$ | $k_{\text{TSW5a}}$ | $k_{\text{RW2}}$  | $k_{\text{TSW6}}$  | $k_{\text{TSW6}}$ | $k_{\text{RW3}}$   | $k_{\text{RW4}}$  |
| 240          | 4.73E-09          | 4.77E-09           | 9.50E-09          | 5.44E-18           | 9.39E-19          | 6.38E-18           | 7.54E-14          |
| 250          | 3.97E-09          | 4.00E-09           | 7.97E-09          | 6.49E-18           | 1.19E-18          | 7.68E-18           | 7.26E-14          |
| 278          | 2.70E-09          | 2.72E-09           | 5.42E-09          | 1.03E-17           | 2.23E-18          | 1.25E-17           | 6.66E-14          |
| 288          | 2.42E-09          | 2.44E-09           | 4.86E-09          | 1.20E-17           | 2.76E-18          | 1.48E-17           | 6.51E-14          |
| 298          | 2.20E-09          | 2.22E-09           | 4.42E-09          | 1.40E-17           | 3.38E-18          | 1.73E-17           | 6.37E-14          |
| 308          | 2.03E-09          | 2.04E-09           | 4.07E-09          | 1.61E-17           | 4.12E-18          | 2.02E-17           | 6.26E-14          |
| 325          | 1.80E-09          | 1.81E-09           | 3.61E-09          | 2.04E-17           | 5.67E-18          | 2.60E-17           | 6.10E-14          |
| 375          | 1.41E-09          | 1.42E-09           | 2.83E-09          | 3.76E-17           | 1.31E-17          | 5.08E-17           | 5.84E-14          |
| 425          | 1.25E-09          | 1.26E-09           | 2.51E-09          | 6.37E-17           | 2.68E-17          | 9.05E-17           | 5.79E-14          |

Keq(IMW1) and Keq(IMW1a) is the equilibrium constant for the process of  $\text{H}_2\text{O} \cdots \text{HO}_2 + \text{HS} \rightarrow {}^3\text{IMW1}$  and  $\text{H}_2\text{O} \cdots \text{HO}_2 + \text{HS} \rightarrow {}^3\text{IMW1a}$ , respectively; Keq(IMW3) and Keq(IMW3a) is the equilibrium constant for the process of  $\text{H}_2\text{O} \cdots \text{HO}_2 + \text{HS} \rightarrow {}^3\text{IMW3}$  and  $\text{H}_2\text{O} \cdots \text{HO}_2 + \text{HS} \rightarrow {}^3\text{IMW3a}$ , respectively;  $k_{\text{TSW1}}$  and  $k_{\text{TSW1a}}$  is the rate constant for the process of  $\text{H}_2\text{O} \cdots \text{HO}_2 + \text{HS} \rightarrow {}^3\text{IMW1} \rightarrow {}^3\text{TSW1} \rightarrow {}^3\text{IMW2}$  and  $\text{H}_2\text{O} \cdots \text{HO}_2 + \text{HS} \rightarrow {}^3\text{IMW1a} \rightarrow {}^3\text{TSW1a} \rightarrow {}^3\text{IMW2a}$ , respectively;  $k_{\text{TSW2}}$  and  $k_{\text{TSW2a}}$  is the rate constant for the process of  ${}^3\text{IMW2} \rightarrow {}^3\text{TSW2} \rightarrow \text{H}_2\text{O} \cdots \text{H}_2\text{S} + {}^3\text{O}_2$  and  ${}^3\text{IMW2a} \rightarrow {}^3\text{TSW2a} \rightarrow \text{H}_2\text{O} \cdots \text{H}_2\text{S} + {}^3\text{O}_2$ , respectively;  $k_{\text{TSW3}}$  and  $k_{\text{TSW3a}}$  is the rate constant for the process of  $\text{H}_2\text{O} \cdots \text{HO}_2 + \text{HS} \rightarrow {}^3\text{IMW3} \rightarrow {}^3\text{TSW3} \rightarrow {}^3\text{IMW4}$  and  $\text{H}_2\text{O} \cdots \text{HO}_2 + \text{HS} \rightarrow {}^3\text{IMW3a} \rightarrow {}^3\text{TSW3a} \rightarrow {}^3\text{IMW4a}$ , respectively;  $k_{\text{TSW4}}$  and  $k_{\text{TSW4a}}$  is the rate constant for the process of  ${}^3\text{IMW4} \rightarrow {}^3\text{TSW4} \rightarrow \text{H}_2\text{O} \cdots \text{H}_2\text{S} + {}^3\text{O}_2$  and  ${}^3\text{IMW4a} \rightarrow {}^3\text{TSW4a} \rightarrow \text{H}_2\text{O} \cdots \text{H}_2\text{S} + {}^3\text{O}_2$ , respectively;  $k_{\text{TSW5}}$  and  $k_{\text{TSW5a}}$  is the rate constant for the process of  $\text{HO}_2 \cdots \text{H}_2\text{O} + \text{HS} \rightarrow {}^3\text{IMW5} \rightarrow {}^3\text{TSW5} \rightarrow {}^3\text{IMFW5} \rightarrow \text{H}_2\text{O} + {}^3\text{O}_2 + \text{H}_2\text{S}$  and

$\text{HO}_2\cdots\text{H}_2\text{O} + \text{HS} \rightarrow {}^3\text{IMW5a} \rightarrow {}^3\text{TSW5a} \rightarrow {}^3\text{IMFW5a} \rightarrow \text{H}_2\text{O} + {}^3\text{O}_2 + \text{H}_2\text{S}$ , respectively;  $k_{\text{TSW6}}$  and  $k_{\text{TSW6a}}$  is the rate constant for the process of  $\text{HS}\cdots\text{H}_2\text{O} + \text{HO}_2 \rightarrow {}^3\text{TSW6} \rightarrow \text{H}_2\text{S}\cdots\text{H}_2\text{O} + {}^3\text{O}_2$  and  $\text{HS}\cdots\text{H}_2\text{O} + \text{HO}_2 \rightarrow {}^3\text{TSW6a} \rightarrow \text{H}_2\text{S}\cdots\text{H}_2\text{O} + {}^3\text{O}_2$ , respectively;  $k_{\text{RW1a}}$ ,  $k_{\text{RW1b}}$ ,  $k_{\text{RW2}}$ ,  $k_{\text{RW3}}$ , and  $k_{\text{RW4}}$  is the rate constant of water dimer- assisted Channels RW1a, RWW1b, RWW2, RWW3 and RWW4. ( $1/k_{\text{RW1a}} = 1/(k_{\text{TSW1}} + k_{\text{TSW1a}}) + 1/(k_{\text{TSW2}} + k_{\text{TSW2a}})$ ,  $1/k_{\text{RW1b}} = 1/(k_{\text{TSW3}} + k_{\text{TSW3a}}) + 1/(k_{\text{TSW4}} + k_{\text{TSW4a}})$ ,  $k_{\text{RWW2}} = k_{\text{TSW5}} + k_{\text{TSW5a}}$ ,  $k_{\text{RWW3}} = k_{\text{TSW6}} + k_{\text{TSW6a}}$ )

**Part C     The H<sub>2</sub>S + <sup>3</sup>O<sub>2</sub> formations from the HO<sub>2</sub> + HS with  
catalyst X (X = (H<sub>2</sub>O)<sub>2</sub>) (pS14-pS23)**

|                  |                                                                                                                                                                                                                                                                                                                                                                                                                                                                                                                                                                                        |                   |
|------------------|----------------------------------------------------------------------------------------------------------------------------------------------------------------------------------------------------------------------------------------------------------------------------------------------------------------------------------------------------------------------------------------------------------------------------------------------------------------------------------------------------------------------------------------------------------------------------------------|-------------------|
| <b>Figure S4</b> | The geometrical structures of the optimized transitions state, intermediates, and complexes involving water dimer-assisted Channels occurring through HO <sub>2</sub> ⋯(H <sub>2</sub> O) <sub>2</sub> (HO <sub>2</sub> ⋯(H <sub>2</sub> O) <sub>2a</sub> , HO <sub>2</sub> ⋯(H <sub>2</sub> O) <sub>2b</sub> ) + HS and HS⋯(H <sub>2</sub> O) <sub>2</sub> (HS⋯(H <sub>2</sub> O) <sub>2a</sub> ) + HO <sub>2</sub>                                                                                                                                                                   | <b>pS15</b>       |
| <b>Figure S5</b> | Schematic energy diagrams of water dimer-assisted the channel of H <sub>2</sub> S + <sup>3</sup> O <sub>2</sub> formations occurring through HO <sub>2</sub> ⋯(H <sub>2</sub> O) <sub>2b</sub> + HS                                                                                                                                                                                                                                                                                                                                                                                    | <b>pS16</b>       |
| <b>Table S6</b>  | Zero point energy (ZPE/(kcal·mol <sup>-1</sup> )), entropies (S/ (cal·mol <sup>-1</sup> ·K <sup>-1</sup> )), relative energies (ΔE and Δ(E+ZPE)/(kcal·mol <sup>-1</sup> )), enthalpies (ΔH(298)/(kcal·mol <sup>-1</sup> )), and free energies (ΔG(298)/(kcal·mol <sup>-1</sup> )) for the trinary complexes (HO <sub>2</sub> ⋯(H <sub>2</sub> O) <sub>2</sub> , HO <sub>2</sub> ⋯(H <sub>2</sub> O) <sub>2a</sub> , HO <sub>2</sub> ⋯(H <sub>2</sub> O) <sub>2b</sub> , HS⋯(H <sub>2</sub> O) <sub>2</sub> , HS⋯(H <sub>2</sub> O) <sub>2a</sub> and (H <sub>2</sub> O) <sub>2</sub> ) | <b>pS17</b>       |
| <b>Table S7</b>  | Zero point energy (ZPE/(kcal·mol <sup>-1</sup> )), relative energies (ΔE and Δ(E+ZPE)/(kcal·mol <sup>-1</sup> )), enthalpies (ΔH(298)/(kcal·mol <sup>-1</sup> )), and free energies (ΔG(298)/(kcal·mol <sup>-1</sup> )) for the HO <sub>2</sub> +HS reaction with water dimer                                                                                                                                                                                                                                                                                                          | <b>pS18</b>       |
| <b>Table S8</b>  | Equilibrium Constants and concentration of water dimer-assisted (H <sub>2</sub> O) <sub>2</sub> within the temperature range of 240.0-425.0 K                                                                                                                                                                                                                                                                                                                                                                                                                                          | <b>pS19</b>       |
| <b>Table S9</b>  | Rate constants (cm <sup>3</sup> ·molecules <sup>-1</sup> ·s <sup>-1</sup> ) for the H <sub>2</sub> S + <sup>3</sup> O <sub>2</sub> formations from the HO <sub>2</sub> + HS reaction occurring through water dimer-assisted Channels RWW1-RWW4 within the temperature range of 240.0-425.0 K                                                                                                                                                                                                                                                                                           | <b>pS (20-21)</b> |
| <b>Table S10</b> | Effective Rate constants (cm <sup>3</sup> ·molecules <sup>-1</sup> ·s <sup>-1</sup> ) for the H <sub>2</sub> S + <sup>3</sup> O <sub>2</sub> formations from the HO <sub>2</sub> + HS reaction occurring through water dimer-assisted Channels RWW1, RWW2 RWW3 and RWW4 within the temperature range of 240.0-425.0 K                                                                                                                                                                                                                                                                  | <b>pS (22-23)</b> |

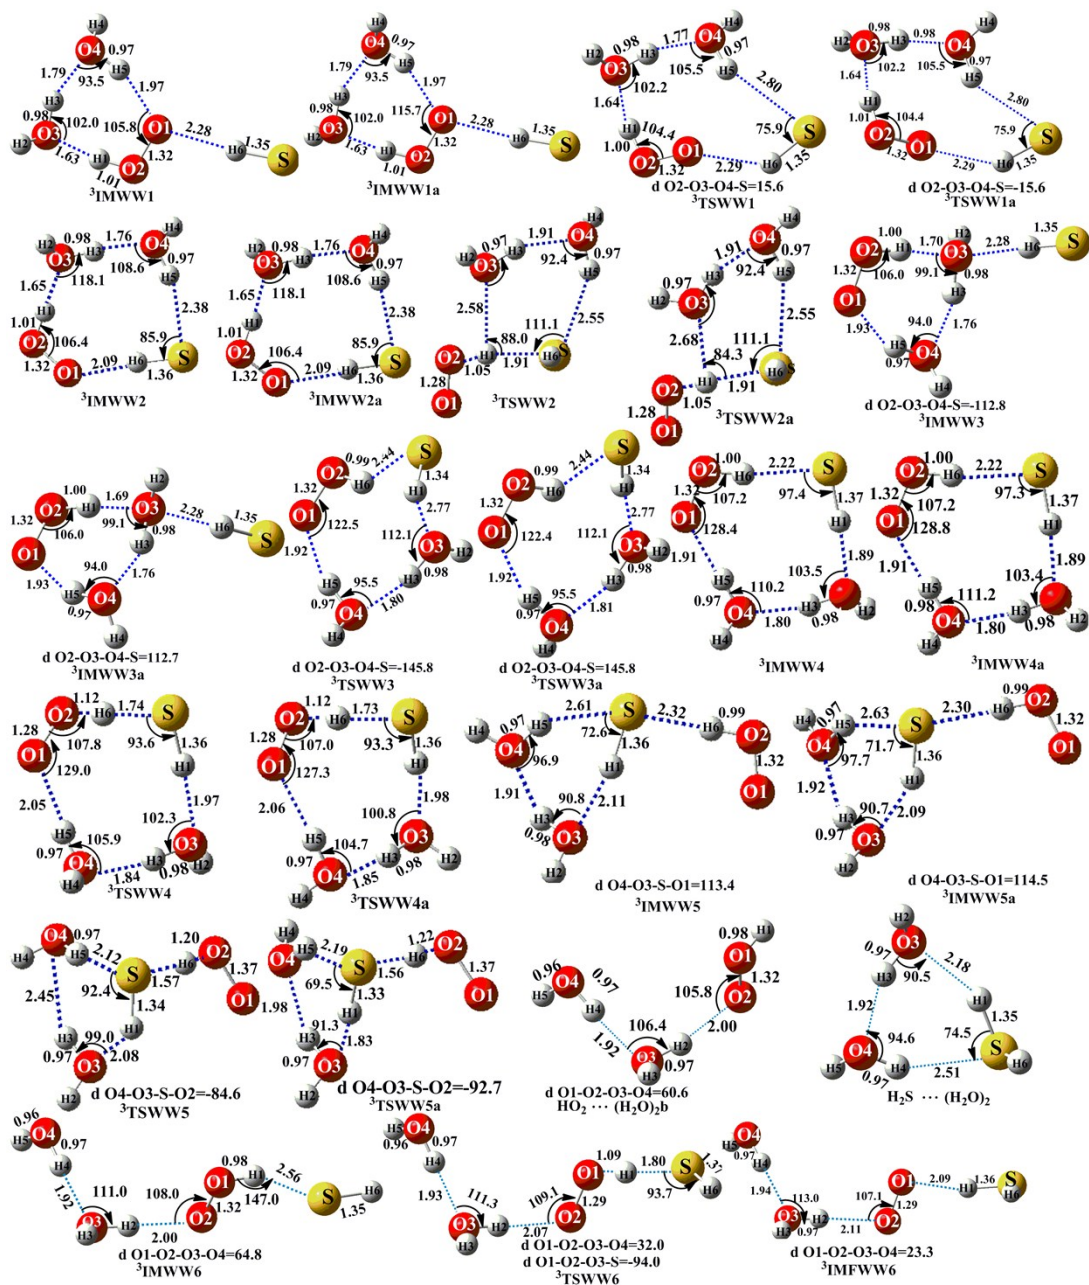

**Figure S4** The geometrical structures of the optimized transition state, intermediates, and complexes involving water dimer-assisted Channels occurring through  $\text{HO}_2 \cdots (\text{H}_2\text{O})_2$  ( $\text{HO}_2 \cdots (\text{H}_2\text{O})_2\text{a}$ ,  $\text{HO}_2 \cdots (\text{H}_2\text{O})_2\text{b}$ ) + HS and  $\text{HS} \cdots (\text{H}_2\text{O})_2$  ( $\text{HS} \cdots (\text{H}_2\text{O})_2\text{a}$ ) +  $\text{HO}_2$

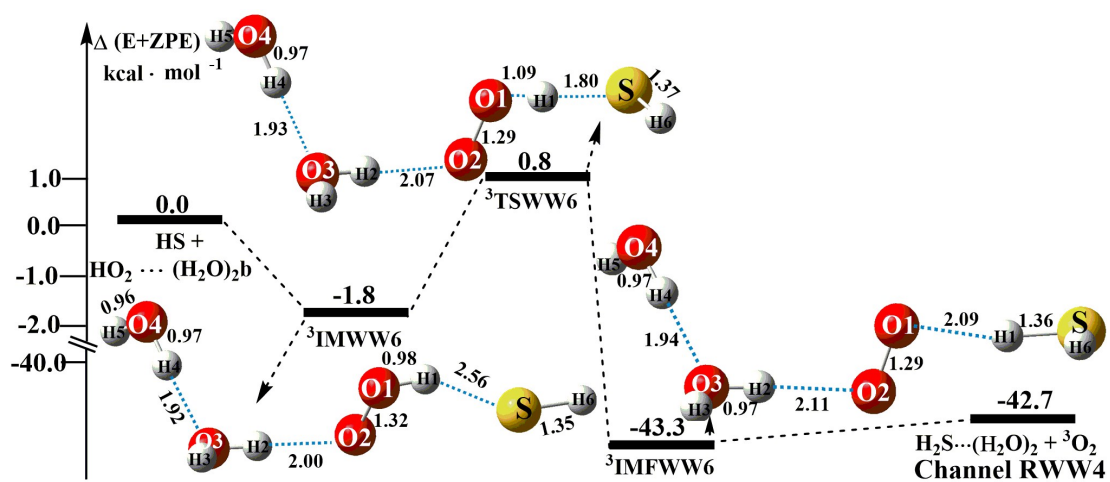

**Figure S5** Schematic energy diagrams of water dimer-assisted the channel of H<sub>2</sub>S + <sup>3</sup>O<sub>2</sub> formations occurring through HO<sub>2</sub>  $\cdots$  (H<sub>2</sub>O)<sub>2</sub>b + HS



**Table S6** Zero point energy (ZPE/(kcal·mol<sup>-1</sup>)), entropies (S/ (cal·mol<sup>-1</sup>·K<sup>-1</sup>)), relative energies ( $\Delta E$  and  $\Delta(E+ZPE)$ /(kcal·mol<sup>-1</sup>)), enthalpies ( $\Delta H(298)$ /(kcal·mol<sup>-1</sup>)), and free energies ( $\Delta G(298)$ /(kcal·mol<sup>-1</sup>)) for the trinary complexes (HO<sub>2</sub>···(H<sub>2</sub>O)<sub>2</sub>, HO<sub>2</sub>···(H<sub>2</sub>O)<sub>2a</sub>, HO<sub>2</sub>···(H<sub>2</sub>O)<sub>2b</sub>, HS···(H<sub>2</sub>O)<sub>2</sub>, HS···(H<sub>2</sub>O)<sub>2a</sub> and (H<sub>2</sub>O)<sub>2</sub>)

| Species                                              | ZPE  | S     | $\Delta E$ | $\Delta H$ | $\Delta G$ | $\Delta(E+ZPE)$ |
|------------------------------------------------------|------|-------|------------|------------|------------|-----------------|
| H <sub>2</sub> O + H <sub>2</sub> O                  | 26.8 | 90.2  | 0.0        | 0.0        | 0.0        | 0.0             |
| (H <sub>2</sub> O) <sub>2</sub>                      | 29.0 | 69.4  | -5.3       | -3.6       | 22.7       | -3.1            |
| (H <sub>2</sub> O) <sub>2</sub> + HO <sub>2</sub>    | 37.9 | 124.0 | 0.0        | 0.0        | 0.0        | 0.0             |
| HO <sub>2</sub> ··· (H <sub>2</sub> O) <sub>2</sub>  | 41.2 | 83.6  | -15.8      | -13.9      | -21.9      | -12.6           |
| HO <sub>2</sub> ··· (H <sub>2</sub> O) <sub>2a</sub> | 41.2 | 83.6  | -15.8      | -13.9      | -21.9      | -12.6           |
| HO <sub>2</sub> ··· (H <sub>2</sub> O) <sub>2b</sub> | 39.5 | 101.0 | -4.7       | -3.2       | -16.4      | -3.2            |
| (H <sub>2</sub> O) <sub>2</sub> + HS                 | 32.8 | 115.3 | 0.0        | 0.0        | 0.0        | 0.0             |
| HS··· (H <sub>2</sub> O) <sub>2</sub>                | 34.7 | 85.9  | -6.2       | -5.0       | -16.4      | -4.3            |
| HS··· (H <sub>2</sub> O) <sub>2a</sub>               | 34.7 | 85.8  | -6.2       | -5.0       | -16.4      | -4.3            |

<sup>a</sup> ZPE and S values obtained at B3LYP/6-311+G(2df,2p) level of theory; The energy values are obtained at CCSD(T)/6-311++G(3df,2pd) level whereas the *H* and *G* corrections are taken from the B3LYP/6-311+G(2df,2p) level.

**Table S7** Zero point energy (ZPE/(kcal·mol<sup>-1</sup>)), relative energies ( $\Delta E$  and  $\Delta(E+ZPE)$ /(kcal·mol<sup>-1</sup>)), enthalpies ( $\Delta H(298)$ /(kcal·mol<sup>-1</sup>)), and free energies ( $\Delta G(298)$ /(kcal·mol<sup>-1</sup>)) for the HO<sub>2</sub> + HS with two water molecule reaction

| Species                                                                             | ZPE  | $\Delta E$ | $\Delta H(298)$ | $\Delta G(298)$ | $\Delta(E+ZPE)$ |
|-------------------------------------------------------------------------------------|------|------------|-----------------|-----------------|-----------------|
| HO <sub>2</sub> •••(H <sub>2</sub> O) <sub>2</sub> + HS                             | 45.0 | 0.0        | 0.0             | 0.0             | 0.0             |
| HO <sub>2</sub> •••(H <sub>2</sub> O) <sub>2</sub> a + HS                           | 45.0 | 0.0        | 0.0             | 0.0             | 0.0             |
| <sup>3</sup> IMWW1                                                                  | 45.8 | -3.7       | -2.7            | 2.8             | -2.8            |
| <sup>3</sup> IMWW1a                                                                 | 45.8 | -3.7       | -2.7            | 2.7             | -2.8            |
| <sup>3</sup> TSWW1                                                                  | 45.2 | -2.6       | -2.5            | 4.5             | -2.5            |
| <sup>3</sup> TSWW1a                                                                 | 45.2 | -2.6       | -2.5            | 4.5             | -2.5            |
| <sup>3</sup> IMWW2                                                                  | 45.6 | -3.2       | -2.4            | 3.9             | -2.7            |
| <sup>3</sup> IMWW2a                                                                 | 45.6 | -3.2       | -2.4            | 3.9             | -2.7            |
| <sup>3</sup> TSWW2                                                                  | 42.5 | 10.9       | 9.4             | 15.3            | 8.9             |
| <sup>3</sup> TSWW2a                                                                 | 42.4 | 11.0       | 8.8             | 14.8            | 8.3             |
| <sup>3</sup> IMWW3                                                                  | 46.0 | -2.5       | -1.4            | 4.6             | -1.5            |
| <sup>3</sup> IMWW3a                                                                 | 46.0 | -2.5       | -1.4            | 4.6             | -1.5            |
| <sup>3</sup> TSWW3                                                                  | 44.6 | 1.9        | 1.8             | 8.3             | 1.6             |
| <sup>3</sup> TSWW3a                                                                 | 44.6 | 1.9        | 1.8             | 8.3             | 1.6             |
| <sup>3</sup> IMWW4                                                                  | 45.5 | -3.8       | 0.3             | 6.9             | -3.6            |
| <sup>3</sup> IMWW4a                                                                 | 45.5 | -3.8       | 0.3             | 6.9             | -3.6            |
| <sup>3</sup> TSWW4                                                                  | 41.8 | 9.4        | 6.1             | 13.3            | 6.0             |
| <sup>3</sup> TSWW4a                                                                 | 41.7 | 9.6        | 6.4             | 13.4            | 6.2             |
| H <sub>2</sub> S •••(H <sub>2</sub> O) <sub>2</sub> + <sup>3</sup> O <sub>2</sub>   | 43.3 | -29.1      | -30.1           | -32.1           | -30.9           |
| H <sub>2</sub> S •••(H <sub>2</sub> O) <sub>2</sub> a + <sup>3</sup> O <sub>2</sub> | 43.3 | -29.1      | -30.2           | -32.1           | -31.0           |
| HS•••(H <sub>2</sub> O) <sub>2</sub> + HO <sub>2</sub>                              | 43.6 | 0.0        | 0.0             | 0.0             | 0.0             |
| HS•••(H <sub>2</sub> O) <sub>2</sub> a + HO <sub>2</sub>                            | 43.6 | 0.0        | 0.0             | 0.0             | 0.0             |
| <sup>3</sup> IMWW5                                                                  | 45.0 | 1.4        | -4.7            | -3.3            | -3.3            |
| <sup>3</sup> IMWW5a                                                                 | 45.0 | 1.4        | -4.9            | -3.4            | -3.4            |
| <sup>3</sup> TSWW5                                                                  | 40.5 | -3.1       | 14.1            | 9.3             | 11.1            |
| <sup>3</sup> TSWW5a                                                                 | 41.5 | -2.0       | 8.3             | 4.6             | 6.3             |
| H <sub>2</sub> S •••(H <sub>2</sub> O) <sub>2</sub> + <sup>3</sup> O <sub>2</sub>   | 43.3 | -0.3       | -38.3           | -38.9           | -39.0           |
| H <sub>2</sub> S •••(H <sub>2</sub> O) <sub>2</sub> a + <sup>3</sup> O <sub>2</sub> | 43.3 | -0.3       | -38.8           | -39.0           | -39.1           |
| HO <sub>2</sub> •••(H <sub>2</sub> O) <sub>2</sub> b + HS                           | 43.3 | 0.0        | 0.0             | 0.0             | 0.0             |
| <sup>3</sup> IMWW6                                                                  | 43.9 | -2.5       | -2.1            | 5.4             | -1.8            |
| <sup>3</sup> TSWW6                                                                  | 41.2 | 2.8        | -0.5            | 4.9             | 0.8             |
| <sup>3</sup> IMFWW6                                                                 | 43.2 | -43.3      | -43.3           | -36.3           | -43.3           |
| H <sub>2</sub> S •••(H <sub>2</sub> O) <sub>2</sub> + <sup>3</sup> O <sub>2</sub>   | 42.9 | -42.3      | -43.3           | -40.1           | -42.7           |

<sup>a</sup> ZPE and S values obtained at B3LYP/6-311+G(2df,2p) level of theory; The energy values are obtained at CCSD(T)/ 6-311++G(3df,2pd) level whereas the H and G corrections are taken from the B3LYP/6-311+G(2df,2p) level.

**Table S8** Equilibrium Constants and concentration of water dimer within the temperature range of 240.0-425.0 K

| $T/K$         | $[H_2O]$ | $K_{eq}((H_2O)_2)$ | $[(H_2O)_2]$ |
|---------------|----------|--------------------|--------------|
| 240           | 8.29E+15 | 4.36E-22           | 3.00E+10     |
| 250           | 2.21E+16 | 3.34E-22           | 1.63E+11     |
| 278           | 2.25E+17 | 1.78E-22           | 8.99E+12     |
| 288           | 4.25E+17 | 1.47E-22           | 2.65E+13     |
| 298           | 7.64E+17 | 1.23E-22           | 7.18E+13     |
| 308           | 1.31E+18 | 1.05E-22           | 1.79E+14     |
| 325           | 3.04E+18 | 8.15E-23           | 7.54E+14     |
| 375           | 2.12E+19 | 4.61E-23           | 2.07E+16     |
| 425           | 8.56E+19 | 3.09E-23           | 2.26E+17     |
| $[(H_2O)_2]=$ |          | $K_{eq}((H_2O)_2)$ | $[H_2O]^2$   |

**Table S9** Rate constants ( $\text{cm}^3 \cdot \text{molecules}^{-1} \cdot \text{s}^{-1}$ ) for the  $\text{H}_2\text{S} + {}^3\text{O}_2$  formations from the  $\text{HO}_2 + \text{HS}$  reaction occurring through water dimer-assisted Channels RWW1-RWW4 within the temperature range of 240.0-425.0 K

| $T/\text{K}$        | Keq(IMWW1)         | Keq(IMWW1a)        | $k_{\text{TSWW1}}$ | $k_{\text{TSWW1a}}$ | $k_{\text{TSWW2}}$  | $k_{\text{TSWW2a}}$ |
|---------------------|--------------------|--------------------|--------------------|---------------------|---------------------|---------------------|
| 240                 | 4.20E-26           | 5.24E-26           | 2.63E-20           | 8.45E-20            | 6.75E+02            | 2.26E+02            |
| 250                 | 4.63E-26           | 5.78E-26           | 5.14E-20           | 2.14E-19            | 1.77E+03            | 6.27E+02            |
| 278                 | 5.52E-26           | 6.89E-26           | 3.32E-19           | 1.26E-18            | 1.85E+04            | 7.46E+03            |
| 288                 | 6.01E-26           | 7.50E-26           | 9.76E-19           | 2.35E-18            | 3.84E+04            | 1.61E+04            |
| 298                 | 6.37E-26           | 7.95E-25           | 1.92E-18           | 5.11E-18            | 7.58E+04            | 3.31E+04            |
| 308                 | 6.80E-26           | 8.48E-25           | 4.22E-18           | 7.05E-18            | 1.44E+05            | 6.51E+04            |
| 325                 | 7.30E-26           | 9.11E-25           | 8.27E-18           | 1.75E-17            | 3.90E+05            | 1.87E+05            |
| 375                 | 9.37E-26           | 1.17E-24           | 9.32E-18           | 2.34E-17            | 4.41E+06            | 2.41E+06            |
| 425                 | 1.04E-25           | 1.30E-24           | 5.21E-17           | 7.04E-17            | 2.86E+07            | 1.73E+07            |
| $k_{\text{RWW1}}$   | $k_{\text{RWW1a}}$ | Keq(IMWW3)         | Keq(IMWW3a)        | $k_{\text{TSWW3}}$  | $k_{\text{TSWW3a}}$ | $k_{\text{TSWW4}}$  |
| 2.63E-20            | 8.45E-20           | 1.22E-23           | 1.23E-23           | 7.26E-17            | 7.17E-17            | 3.10E+08            |
| 5.14E-20            | 2.14E-19           | 1.30E-23           | 1.31E-23           | 9.01E-17            | 8.91E-17            | 3.95E+08            |
| 3.32E-19            | 1.26E-18           | 1.48E-23           | 1.48E-23           | 1.56E-16            | 1.54E-16            | 7.53E+08            |
| 9.76E-19            | 2.35E-18           | 1.58E-23           | 1.58E-23           | 1.86E-16            | 1.84E-16            | 9.38E+08            |
| 1.92E-18            | 5.11E-18           | 1.65E-23           | 1.66E-23           | 2.21E-16            | 2.18E-16            | 1.16E+09            |
| 4.22E-18            | 7.05E-18           | 1.73E-23           | 1.74E-23           | 2.60E-16            | 2.57E-16            | 1.43E+09            |
| 8.27E-18            | 1.75E-17           | 1.83E-23           | 1.84E-23           | 3.37E-16            | 3.33E-16            | 2.01E+09            |
| 9.32E-18            | 2.34E-17           | 2.24E-23           | 2.25E-23           | 6.59E-16            | 6.52E-16            | 4.93E+09            |
| 5.21E-17            | 7.04E-17           | 2.44E-23           | 2.45E-23           | 1.16E-15            | 1.14E-15            | 1.05E+10            |
| $k_{\text{TSWW4a}}$ | $k_{\text{RWW2}}$  | $k_{\text{RWW2a}}$ | $k_{\text{RWW3}}$  | $k_{\text{RWW3a}}$  | $k_{\text{RWW4}}$   |                     |
| 3.31E+08            | 7.26E-17           | 7.17E-17           | 4.01E-22           | 3.83E-22            | 4.61E-15            |                     |
| 4.24E+08            | 9.01E-17           | 8.91E-17           | 4.60E-22           | 4.15E-22            | 4.41E-15            |                     |
| 8.25E+08            | 1.56E-16           | 1.54E-16           | 7.75E-22           | 6.03E-22            | 4.04E-15            |                     |
| 1.03E+09            | 1.86E-16           | 1.84E-16           | 9.68E-22           | 7.19E-22            | 3.96E-15            |                     |
| 1.29E+09            | 2.21E-16           | 2.18E-16           | 1.23E-21           | 8.71E-22            | 3.89E-15            |                     |
| 1.59E+09            | 2.60E-16           | 2.57E-16           | 1.58E-21           | 1.07E-21            | 3.85E-15            |                     |
| 2.24E+09            | 3.37E-16           | 3.33E-16           | 2.45E-21           | 1.55E-21            | 3.79E-15            |                     |
| 5.51E+09            | 6.59E-16           | 6.52E-16           | 9.26E-21           | 4.86E-21            | 3.77E-15            |                     |
| 1.18E+10            | 1.16E-15           | 1.14E-15           | 3.24E-20           | 1.45E-20            | 3.88E-15            |                     |

Keq(IMWW1) and Keq(IMWW1a) is the equilibrium constant for the process of  $\text{HO}_2 \bullet \bullet \bullet (\text{H}_2\text{O})_2 + \text{HS} \rightarrow {}^3\text{IMW1}$  and  $\text{HO}_2 \bullet \bullet \bullet (\text{H}_2\text{O})_2\text{a} + \text{HS} \rightarrow {}^3\text{IMW1a}$  respectively; Keq(IMWW3) and Keq(IMWW3a) is the equilibrium constant for the process of  $\text{HO}_2 \bullet \bullet \bullet (\text{H}_2\text{O})_2 + \text{HS} \rightarrow {}^3\text{IMW3}$  and  $\text{HO}_2 \bullet \bullet \bullet (\text{H}_2\text{O})_2\text{a} + \text{HS} \rightarrow {}^3\text{IMW3a}$  respectively;  $k_{\text{TSWW1}}$  and  $k_{\text{TSWW1a}}$  is the rate constant for the process of  $\text{HO}_2 \bullet \bullet \bullet (\text{H}_2\text{O})_2 + \text{HS} \rightarrow {}^3\text{IMWW1} \rightarrow {}^3\text{TSWW1} \rightarrow {}^3\text{IMWW2}$  and  $\text{HO}_2 \bullet \bullet \bullet (\text{H}_2\text{O})_2\text{a} + \text{HS} \rightarrow {}^3\text{IMWW1a} \rightarrow {}^3\text{TSWW1a} \rightarrow {}^3\text{IMWW2a}$ , respectively;  $k_{\text{TSWW2}}$  and  $k_{\text{TSWW2a}}$  is the rate constant for the process of  ${}^3\text{IMWW2} \rightarrow {}^3\text{TSWW2} \rightarrow \text{H}_2\text{S} \bullet \bullet \bullet (\text{H}_2\text{O})_2 + {}^3\text{O}_2$  and  ${}^3\text{IMWW2a} \rightarrow {}^3\text{TSWW2a} \rightarrow \text{H}_2\text{S} \bullet \bullet \bullet (\text{H}_2\text{O})_2\text{a} + {}^3\text{O}_2$ , respectively;  $k_{\text{RWW1}}$  and  $k_{\text{RWW1a}}$  is the rate constant for the process of  $\text{HO}_2 \bullet \bullet \bullet (\text{H}_2\text{O})_2 + \text{HS} \rightarrow {}^3\text{IMWW1} \rightarrow {}^3\text{TSWW1} \rightarrow {}^3\text{IMWW2} \rightarrow {}^3\text{TSWW2} \rightarrow \text{H}_2\text{S} \bullet \bullet \bullet (\text{H}_2\text{O})_2 + {}^3\text{O}_2$  and  $\text{HO}_2 \bullet \bullet \bullet (\text{H}_2\text{O})_2\text{a} + \text{HS} \rightarrow {}^3\text{IMWW1a} \rightarrow {}^3\text{TSWW1a} \rightarrow {}^3\text{IMWW2a} \rightarrow {}^3\text{TSWW2a} \rightarrow \text{H}_2\text{S} \bullet \bullet \bullet (\text{H}_2\text{O})_2\text{a} + {}^3\text{O}_2$ , respectively;  $k_{\text{TSWW3}}$  and  $k_{\text{TSWW3a}}$  is the rate

constant for the process of  $\text{HO}_2\bullet\bullet\bullet(\text{H}_2\text{O})_2 + \text{HS} \rightarrow {}^3\text{IMWW3} \rightarrow {}^3\text{TSWW3} \rightarrow {}^3\text{IMWW4}$  and  $\text{HO}_2\bullet\bullet\bullet(\text{H}_2\text{O})_{2a} + \text{HS} \rightarrow {}^3\text{IMWW3a} \rightarrow {}^3\text{TSWW3a} \rightarrow {}^3\text{IMWW4a}$ , respectively;  $k_{\text{TSWW4}}$  and  $k_{\text{TSWW4a}}$  is the rate constant for the process of  ${}^3\text{IMWW4} \rightarrow {}^3\text{TSWW4} \rightarrow \text{H}_2\text{S}\bullet\bullet\bullet(\text{H}_2\text{O})_2 + {}^3\text{O}_2$  and  ${}^3\text{IMWW4a} \rightarrow {}^3\text{TSWW4a} \rightarrow \text{H}_2\text{S}\bullet\bullet\bullet(\text{H}_2\text{O})_{2a} + {}^3\text{O}_2$ , respectively;  $k_{\text{RWW2}}$  and  $k_{\text{RWW2a}}$  is the rate constant for the process of  $\text{HO}_2\bullet\bullet\bullet(\text{H}_2\text{O})_2 + \text{HS} \rightarrow {}^3\text{IMWW3} \rightarrow {}^3\text{TSWW3} \rightarrow {}^3\text{IMWW4} \rightarrow {}^3\text{TSWW4} \rightarrow \text{H}_2\text{S}\bullet\bullet\bullet(\text{H}_2\text{O})_2 + {}^3\text{O}_2$  and  $\text{HO}_2\bullet\bullet\bullet(\text{H}_2\text{O})_{2a} + \text{HS} \rightarrow {}^3\text{IMWW3a} \rightarrow {}^3\text{TSWW3a} \rightarrow {}^3\text{IMWW4a} \rightarrow {}^3\text{TSWW4a} \rightarrow \text{H}_2\text{S}\bullet\bullet\bullet(\text{H}_2\text{O})_{2a} + {}^3\text{O}_2$ , respectively;  $k_{\text{RWW3}}$  and  $k_{\text{RWW3a}}$  is the rate constant for the process of  $\text{HS}\bullet\bullet\bullet(\text{H}_2\text{O})_2 + \text{HO}_2 \rightarrow {}^3\text{IMWW5} \rightarrow {}^3\text{TSWW5} \rightarrow \text{H}_2\text{S}\bullet\bullet\bullet(\text{H}_2\text{O})_2 + {}^3\text{O}_2$  and  $\text{HS}\bullet\bullet\bullet(\text{H}_2\text{O})_{2a} + \text{HO}_2 \rightarrow {}^3\text{IMWW5a} \rightarrow {}^3\text{TSWW5a} \rightarrow \text{H}_2\text{S}\bullet\bullet\bullet(\text{H}_2\text{O})_{2a} + {}^3\text{O}_2$ , respectively;  $k_{\text{RWW4}}$  is the rate constant of water dimer-assisted Channels RWW4. ( $1/k_{\text{RWW1}} = 1/k_{\text{TSWW1}} + 1/k_{\text{TSWW2}}$ ,  $1/k_{\text{RWW1a}} = 1/k_{\text{TSWW1a}} + 1/k_{\text{TSWW2a}}$ ,  $1/k_{\text{RWW2}} = 1/k_{\text{TSWW3}} + 1/k_{\text{TSWW4}}$ ,  $1/k_{\text{RWW2a}} = 1/k_{\text{TSWW3a}} + 1/k_{\text{TSWW4a}}$ )

**Table S10** Effective Rate constants ( $\text{cm}^3 \cdot \text{molecules}^{-1} \cdot \text{s}^{-1}$ ) for the  $\text{H}_2\text{S} + {}^3\text{O}_2$  formations from the  $\text{HO}_2 + \text{HS}$  reaction occurring through water dimer-assisted Channels RWW1, RWW2 RWW3 and RWW4 within the temperature range of 240.0-425.0 K

| $T/\text{K}$                                               | $[(\text{H}_2\text{O})_2]$                               | $\text{Keq}(\text{HO}_2 \cdots (\text{H}_2\text{O})_2)$ | $\text{Keq}(\text{HO}_2 \cdots (\text{H}_2\text{O})_{2a})$ | $k_{\text{RWW1}}$  | $k_{\text{RWW1a}}$  |
|------------------------------------------------------------|----------------------------------------------------------|---------------------------------------------------------|------------------------------------------------------------|--------------------|---------------------|
| 240                                                        | 3.00E+10                                                 | 2.01E-16                                                | 2.04E-16                                                   | 2.63E-20           | 8.45E-20            |
| 250                                                        | 1.63E+11                                                 | 6.57E-17                                                | 6.65E-17                                                   | 5.14E-20           | 2.14E-19            |
| 278                                                        | 8.99E+12                                                 | 4.41E-18                                                | 4.46E-18                                                   | 3.32E-19           | 1.26E-18            |
| 288                                                        | 2.65E+13                                                 | 1.91E-18                                                | 1.93E-18                                                   | 9.76E-19           | 2.35E-18            |
| 298                                                        | 7.18E+13                                                 | 8.76E-19                                                | 8.86E-19                                                   | 1.92E-18           | 5.11E-18            |
| 308                                                        | 1.79E+14                                                 | 4.23E-19                                                | 4.27E-19                                                   | 4.22E-18           | 7.05E-18            |
| 325                                                        | 7.54E+14                                                 | 1.36E-19                                                | 1.38E-19                                                   | 8.27E-18           | 1.75E-17            |
| 375                                                        | 2.07E+16                                                 | 8.92E-21                                                | 9.02E-21                                                   | 9.32E-18           | 2.34E-17            |
| 425                                                        | 2.26E+17                                                 | 1.13E-21                                                | 1.14E-21                                                   | 5.21E-17           | 7.04E-17            |
| $k'_{\text{RWW1}}$                                         | $k'_{\text{RWW1a}}$                                      | $k_{\text{RWW2}}$                                       | $k_{\text{RWW2a}}$                                         | $k'_{\text{RWW2}}$ | $k'_{\text{RWW2}}$  |
| 1.59E-25                                                   | 5.16E-25                                                 | 7.26E-17                                                | 7.17E-17                                                   | 4.38E-22           | 4.38E-22            |
| 5.51E-25                                                   | 2.32E-24                                                 | 9.01E-17                                                | 8.91E-17                                                   | 9.66E-22           | 9.65E-22            |
| 1.32E-23                                                   | 5.05E-23                                                 | 1.56E-16                                                | 1.54E-16                                                   | 6.18E-21           | 6.18E-21            |
| 4.94E-23                                                   | 1.20E-22                                                 | 1.86E-16                                                | 1.84E-16                                                   | 9.43E-21           | 9.43E-21            |
| 1.21E-22                                                   | 3.25E-22                                                 | 2.21E-16                                                | 2.18E-16                                                   | 1.39E-20           | 1.39E-20            |
| 3.19E-22                                                   | 5.39E-22                                                 | 2.60E-16                                                | 2.57E-16                                                   | 1.97E-20           | 1.96E-20            |
| 8.49E-22                                                   | 1.82E-21                                                 | 3.37E-16                                                | 3.33E-16                                                   | 3.46E-20           | 3.46E-20            |
| 1.72E-21                                                   | 4.37E-21                                                 | 6.59E-16                                                | 6.52E-16                                                   | 1.22E-19           | 1.22E-19            |
| 1.33E-20                                                   | 1.82E-20                                                 | 1.16E-15                                                | 1.14E-15                                                   | 2.96E-19           | 2.96E-19            |
| $\text{Keq}(\text{HS} \cdots (\text{H}_2\text{O})_2)$      | $\text{Keq}(\text{HS} \cdots (\text{H}_2\text{O})_{2a})$ | $k_{\text{RWW3}}$                                       | $k_{\text{RWW3a}}$                                         | $k'_{\text{RWW3}}$ | $k'_{\text{RWW3a}}$ |
| 3.20E-22                                                   | 4.84E-22                                                 | 4.01E-22                                                | 3.83E-22                                                   | 3.85E-33           | 5.56E-33            |
| 2.09E-22                                                   | 3.29E-22                                                 | 4.60E-22                                                | 4.15E-22                                                   | 1.57E-32           | 2.23E-32            |
| 7.44E-23                                                   | 1.31E-22                                                 | 7.75E-22                                                | 6.03E-22                                                   | 5.18E-31           | 7.10E-31            |
| 5.41E-23                                                   | 9.85E-23                                                 | 9.68E-22                                                | 7.19E-22                                                   | 1.39E-30           | 1.88E-30            |
| 4.02E-23                                                   | 7.58E-23                                                 | 1.23E-21                                                | 8.71E-22                                                   | 3.55E-30           | 4.74E-30            |
| 3.04E-23                                                   | 5.94E-23                                                 | 1.58E-21                                                | 1.07E-21                                                   | 8.60E-30           | 1.14E-29            |
| 1.98E-23                                                   | 4.08E-23                                                 | 2.45E-21                                                | 1.55E-21                                                   | 3.66E-29           | 4.77E-29            |
| 7.04E-24                                                   | 1.68E-23                                                 | 9.26E-21                                                | 4.86E-21                                                   | 1.35E-27           | 1.69E-27            |
| 3.24E-24                                                   | 8.77E-24                                                 | 3.24E-20                                                | 1.45E-20                                                   | 2.37E-26           | 2.87E-26            |
| $\text{Keq}(\text{HO}_2 \cdots (\text{H}_2\text{O})_{2b})$ | $k_{\text{RWW4}}$                                        | $k'_{\text{RWW4}}$                                      |                                                            |                    |                     |
| 1.16E-29                                                   | 4.61E-15                                                 | 1.60E-33                                                |                                                            |                    |                     |
| 2.14E-29                                                   | 4.41E-15                                                 | 1.54E-32                                                |                                                            |                    |                     |
| 9.60E-29                                                   | 4.04E-15                                                 | 3.49E-30                                                |                                                            |                    |                     |
| 1.54E-28                                                   | 3.96E-15                                                 | 1.61E-29                                                |                                                            |                    |                     |
| 2.40E-28                                                   | 3.89E-15                                                 | 6.70E-29                                                |                                                            |                    |                     |
| 3.64E-28                                                   | 3.85E-15                                                 | 2.51E-28                                                |                                                            |                    |                     |
| 7.03E-28                                                   | 3.79E-15                                                 | 2.01E-27                                                |                                                            |                    |                     |
| 3.59E-27                                                   | 3.77E-15                                                 | 2.80E-25                                                |                                                            |                    |                     |
| 1.32E-26                                                   | 3.88E-15                                                 | 1.16E-23                                                |                                                            |                    |                     |

$K_{eq}(HO_2\cdots(H_2O)_2)$  is the equilibrium constant of  $HO_2\cdots(H_2O)_2$  complex;  $K_{eq}(HO_2\cdots(H_2O)_{2a})$  is the equilibrium constant of  $HO_2\cdots(H_2O)_{2a}$  complex;  $K_{eq}(HS\cdots(H_2O)_2)$  is the equilibrium constant of  $HS\cdots(H_2O)_2$  complex;  $K_{eq}(HS\cdots(H_2O)_{2a})$  is the equilibrium constant of  $HS\cdots(H_2O)_{2a}$  complex;  $K_{eq}(HO_2\cdots(H_2O)_{2b})$  is the equilibrium constant of  $HO_2\cdots(H_2O)_{2b}$  complex;  $k_{RWW1}$  and  $k_{RWW1a}$  is the rate constant for the process of  $HO_2\cdots(H_2O)_2 + HS \rightarrow {}^3IMWW1 \rightarrow {}^3TSWW1 \rightarrow {}^3IMWW2 \rightarrow {}^3TSWW2 \rightarrow H_2S\cdots(H_2O)_2 + {}^3O_2$  and  $HO_2\cdots(H_2O)_{2a} + HS \rightarrow {}^3IMWW1a \rightarrow {}^3TSWW1a \rightarrow {}^3IMWW2a \rightarrow {}^3TSWW2a \rightarrow H_2S\cdots(H_2O)_{2a} + {}^3O_2$ , respectively;  $k_{RWW2}$  and  $k_{RWW2a}$  is the rate constant for the process of  $HO_2\cdots(H_2O)_2 + HS \rightarrow {}^3IMWW3 \rightarrow {}^3TSWW3 \rightarrow {}^3IMWW4 \rightarrow {}^3TSWW4 \rightarrow H_2S\cdots(H_2O)_2 + {}^3O_2$  and  $HO_2\cdots(H_2O)_{2a} + HS \rightarrow {}^3IMWW3a \rightarrow {}^3TSWW3a \rightarrow {}^3IMWW4a \rightarrow {}^3TSWW4a \rightarrow H_2S\cdots(H_2O)_{2a} + {}^3O_2$ , respectively;  $k_{RWW3}$  and  $k_{RWW3a}$  is the rate constant for the process of  $HS\cdots(H_2O)_2 + HO_2 \rightarrow {}^3IMWW5 \rightarrow {}^3TSWW5 \rightarrow H_2S\cdots(H_2O)_2 + {}^3O_2$  and  $HS\cdots(H_2O)_{2a} + HO_2 \rightarrow {}^3IMWW5a \rightarrow {}^3TSWW5a \rightarrow H_2S\cdots(H_2O)_{2a} + {}^3O_2$ , respectively;  $k_{RWW4}$  is the rate constant of water dimer-assisted Channels RWW4;  $[(H_2O)_2]$  is the concentration of the water dimer;  $k'_{RWW1}$  and  $k'_{RWW1a}$  is the effective rate constant for the process of  $HO_2\cdots(H_2O)_2 + HS \rightarrow {}^3IMWW1 \rightarrow {}^3TSWW1 \rightarrow {}^3IMWW2 \rightarrow {}^3TSWW2 \rightarrow H_2S\cdots(H_2O)_2 + {}^3O_2$  and  $HO_2\cdots(H_2O)_{2a} + HS \rightarrow {}^3IMWW1a \rightarrow {}^3TSWW1a \rightarrow {}^3IMWW2a \rightarrow {}^3TSWW2a \rightarrow H_2S\cdots(H_2O)_{2a} + {}^3O_2$ , respectively;  $k'_{RWW2}$  and  $k'_{RWW2a}$  is the effective rate constant for the process of  $HO_2\cdots(H_2O)_2 + HS \rightarrow {}^3IMWW3 \rightarrow {}^3TSWW3 \rightarrow {}^3IMWW4 \rightarrow {}^3TSWW4 \rightarrow H_2S\cdots(H_2O)_2 + {}^3O_2$  and  $HO_2\cdots(H_2O)_{2a} + HS \rightarrow {}^3IMWW3a \rightarrow {}^3TSWW3a \rightarrow {}^3IMWW4a \rightarrow {}^3TSWW4a \rightarrow H_2S\cdots(H_2O)_{2a} + {}^3O_2$ , respectively;  $k'_{RWW3}$  and  $k'_{RWW3a}$  is the effective rate constant for the process of  $HS\cdots(H_2O)_2 + HO_2 \rightarrow {}^3IMWW5 \rightarrow {}^3TSWW5 \rightarrow H_2S\cdots(H_2O)_2 + {}^3O_2$  and  $HS\cdots(H_2O)_{2a} + HO_2 \rightarrow {}^3IMWW5a \rightarrow {}^3TSWW5a \rightarrow H_2S\cdots(H_2O)_{2a} + {}^3O_2$ , respectively;  $k'_{RWW4}$  the effective rate constant of water dimer-assisted Channels RWW4; ( $k'_{RWW1} = k_{RWW1} \cdot K_{eq}(HO_2\cdots(H_2O)_2) \cdot [(H_2O)_2]$ ,  $k'_{RWW1a} = k_{RWW1a} \cdot K_{eq}(HO_2\cdots(H_2O)_{2a}) \cdot [(H_2O)_2]$ ,  $k'_{RWW2} = k_{RWW2} \cdot K_{eq}(HO_2\cdots(H_2O)_2) \cdot [(H_2O)_2]$ ,  $k'_{RWW2a} = k_{RWW2a} \cdot K_{eq}(HO_2\cdots(H_2O)_{2a}) \cdot [(H_2O)_2]$ ,  $k'_{RWW3} = k_{RWW3} \cdot K_{eq}(HS\cdots(H_2O)_2) \cdot [(H_2O)_2]$ ,  $k'_{RWW3a} = k_{RWW3a} \cdot K_{eq}(HS\cdots(H_2O)_{2a}) \cdot [(H_2O)_2]$ ,  $k'_{RWW4} = k_{RWW4} \cdot K_{eq}(HO_2\cdots(H_2O)_{2b}) \cdot [(H_2O)_2]$ )

**Part D      The  $\text{H}_2\text{S} + {}^3\text{O}_2$  formations from the  $\text{HO}_2 + \text{HS}$  with catalyst  $X$  ( $X = (\text{H}_2\text{O})_3$ )(pS24-pS29)**

|                  |                                                                                                                                                                                                                                                                                                                                                                                                                                             |             |
|------------------|---------------------------------------------------------------------------------------------------------------------------------------------------------------------------------------------------------------------------------------------------------------------------------------------------------------------------------------------------------------------------------------------------------------------------------------------|-------------|
| <b>Figure S6</b> | The geometrical structures of the optimized transitions state, intermediates, and complexes involving in $\text{HO}_2\cdots(\text{H}_2\text{O})_3$ ( $\text{HO}_2\cdots(\text{H}_2\text{O})_{3a}$ ) + HS reactions                                                                                                                                                                                                                          | <b>pS25</b> |
| <b>Table S11</b> | Zero point energy (ZPE/(kcal·mol <sup>-1</sup> )), entropies (S/(cal·mol <sup>-1</sup> ·K <sup>-1</sup> )), relative energies ( $\Delta E$ and $\Delta(E+ZPE)$ /(kcal·mol <sup>-1</sup> )), enthalpies ( $\Delta H(298)$ /(kcal·mol <sup>-1</sup> )), and free energies ( $\Delta G(298)$ /(kcal·mol <sup>-1</sup> )) for the quadruple complexes ( $\text{HO}_2\cdots(\text{H}_2\text{O})_3$ and $\text{HS}\cdots(\text{H}_2\text{O})_3$ ) | <b>pS26</b> |
| <b>Table S12</b> | Zero point energy (ZPE/(kcal·mol <sup>-1</sup> )), relative energies ( $\Delta E$ and $\Delta(E+ZPE)$ /(kcal·mol <sup>-1</sup> )), enthalpies ( $\Delta H(298)$ /(kcal·mol <sup>-1</sup> )), and free energies ( $\Delta G(298)$ /(kcal·mol <sup>-1</sup> )) for the $\text{HO}_2 + \text{HS}$ with water trimer                                                                                                                            | <b>pS27</b> |
| <b>Table S13</b> | Equilibrium constants and concentration of water trimer-assisted the $\text{H}_2\text{S} + {}^3\text{O}_2$ formations from the $\text{HO}_2 + \text{HS}$ reaction within the temperature range of 240.0-425.0 K                                                                                                                                                                                                                             | <b>pS28</b> |
| <b>Table S14</b> | Rate constants and effective rate constants (cm <sup>3</sup> ·molecules <sup>-1</sup> ·s <sup>-1</sup> ) for the $\text{H}_2\text{S} + {}^3\text{O}_2$ formations from the $\text{HO}_2 + \text{HS}$ reaction occurring through $\text{HO}_2\cdots(\text{H}_2\text{O})_3$ ( $\text{HO}_2\cdots(\text{H}_2\text{O})_{3a}$ ) + HS reactions within the temperature range of 240.0-425.0 K                                                     | <b>pS29</b> |



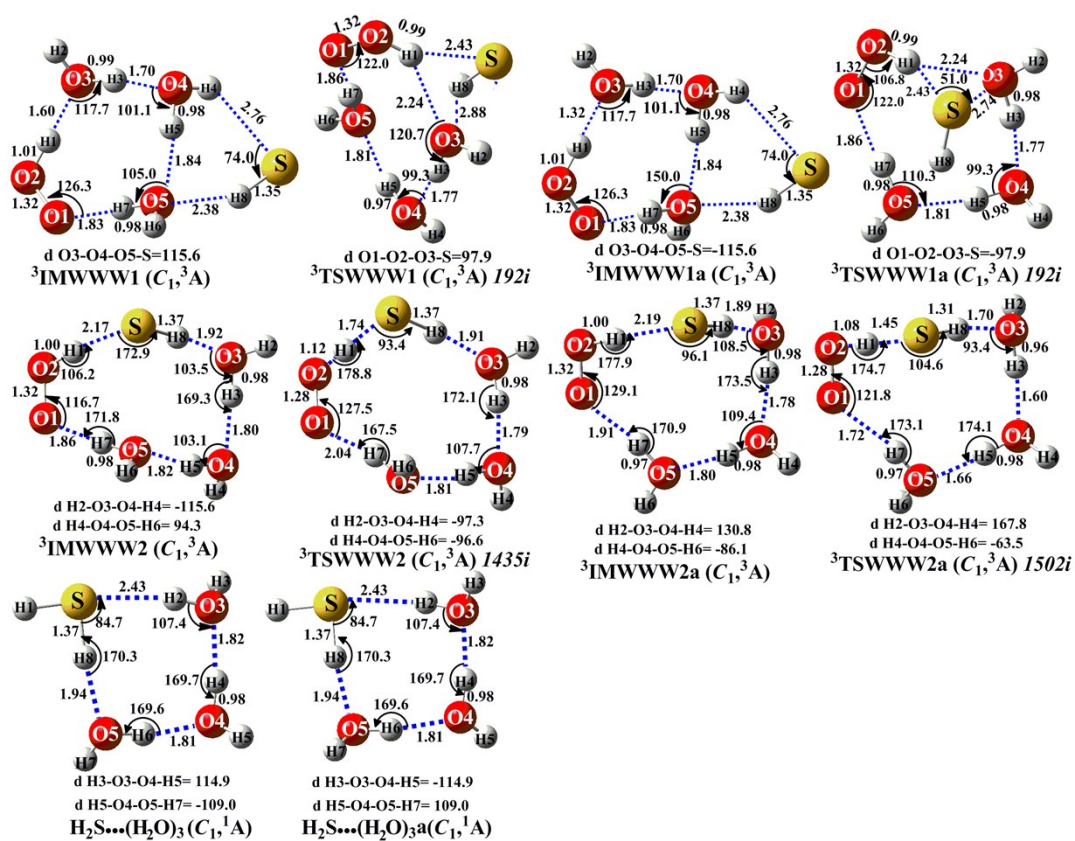

**Figure S6** The geometrical structures of the optimized transition state, intermediates, and complexes involving water trimer-assisted Channels occurring through  $HO_2\cdots(H_2O)_3$  ( $HO_2\cdots(H_2O)_3a$ ) + HS reactions

**Table S11** Zero point energy (ZPE/(kcal·mol<sup>-1</sup>)), entropies (S/(cal·mol<sup>-1</sup>·K<sup>-1</sup>)), relative energies ( $\Delta E$  and  $\Delta(E+ZPE)$ /(kcal·mol<sup>-1</sup>)), enthalpies ( $\Delta H(298)$ /(kcal·mol<sup>-1</sup>)), and free energies ( $\Delta G(298)$ /(kcal·mol<sup>-1</sup>)) for the quadruple complexes (HO<sub>2</sub>···(H<sub>2</sub>O)<sub>3</sub> and HS···(H<sub>2</sub>O)<sub>3</sub>)

| Species                                               | ZPE  | S     | $\Delta E$ | $\Delta H$ | $\Delta G$ | $\Delta(E+ZPE)$ |
|-------------------------------------------------------|------|-------|------------|------------|------------|-----------------|
| (H <sub>2</sub> O) <sub>2</sub> + H <sub>2</sub> O    | 42.4 | 114.5 | 0.0        | 0.0        | 0.0        | 0.0             |
| (H <sub>2</sub> O) <sub>3</sub>                       | 45.7 | 79.5  | -11.0      | -9.0       | -18.7      | -7.7            |
| (H <sub>2</sub> O) <sub>3</sub> + HO <sub>2</sub>     | 54.6 | 134.2 | 0.0        | 0.0        | 0.0        | 0.0             |
| HO <sub>2</sub> ··· (H <sub>2</sub> O) <sub>3</sub>   | 56.8 | 99.8  | -14.6      | -13.1      | -2.8       | -12.5           |
| HO <sub>2</sub> ··· (H <sub>2</sub> O) <sub>3</sub> a | 56.8 | 99.8  | -14.6      | -13.1      | -2.8       | -12.5           |
| (H <sub>2</sub> O) <sub>3</sub> + HS                  | 49.5 | 125.4 | 0.0        | 0.0        | 0.0        | 0.0             |
| HS··· (H <sub>2</sub> O) <sub>3</sub>                 | 50.6 | 99.7  | -4.9       | -4.0       | 3.6        | -3.8            |
| HS··· (H <sub>2</sub> O) <sub>3</sub> a               | 50.6 | 99.7  | -4.9       | -4.0       | 3.6        | -3.8            |

<sup>a</sup> ZPE and S values obtained at B3LYP/6-311+G(2df,2p) level of theory; The energy values are obtained at CCSD(T)/ 6-311++G(3df,2pd) level whereas the *H* and *G* corrections are taken from the B3LYP/6-311+G(2df,2p) level.

**Table S12** Zero point energy (ZPE/(kcal·mol<sup>-1</sup>)), relative energies ( $\Delta E$  and  $\Delta(E+ZPE)$ /(kcal·mol<sup>-1</sup>)), enthalpies ( $\Delta H(298)$ /(kcal·mol<sup>-1</sup>)), and free energies ( $\Delta G(298)$ /(kcal·mol<sup>-1</sup>)) for the HO<sub>2</sub> + HS with water trimer<sup>a</sup>

| Species                                                                           | ZPE  | $\Delta E$ | $\Delta H$ | $\Delta G$ | $\Delta(E+ZPE)$ |
|-----------------------------------------------------------------------------------|------|------------|------------|------------|-----------------|
| HO <sub>2</sub> ···(H <sub>2</sub> O) <sub>3</sub> +HS                            | 60.6 | 0.0        | 0.0        | 0.0        | 0.0             |
| HO <sub>2</sub> ···(H <sub>2</sub> O) <sub>3</sub> +HSa                           | 60.6 | 0.0        | 0.0        | 0.0        | 0.0             |
| HS···(H <sub>2</sub> O) <sub>3</sub> +HO <sub>2</sub>                             | 59.5 | 9.8        | 9.0        | 6.4        | 8.7             |
| HS···(H <sub>2</sub> O) <sub>3</sub> +HO <sub>2</sub> a                           | 59.5 | 9.8        | 9.0        | 6.4        | 8.7             |
| <sup>3</sup> IMWWW1                                                               | 61.7 | -4.1       | -3.1       | 4.3        | -3.0            |
| <sup>3</sup> IMWWW1a                                                              | 61.7 | -4.1       | -3.1       | 4.3        | -3.0            |
| <sup>3</sup> TSWWW1                                                               | 60.8 | 1.6        | 1.8        | 10.0       | 1.9             |
| <sup>3</sup> TSWWW1a                                                              | 60.8 | 1.6        | 1.8        | 10.0       | 1.9             |
| <sup>3</sup> IMWWW2                                                               | 61.2 | 0.6        | 1.3        | 8.2        | -0.8            |
| <sup>3</sup> IMWWW2a                                                              | 61.0 | 1.5        | 2.1        | 8.4        | -0.7            |
| <sup>3</sup> TSWWW2                                                               | 57.5 | 10.3       | 7.2        | 14.6       | 7.3             |
| <sup>3</sup> TSWWW2a                                                              | 57.4 | 10.7       | 7.5        | 14.3       | 7.5             |
| <sup>3</sup> O <sub>2</sub> +H <sub>2</sub> S···(H <sub>2</sub> O) <sub>3</sub>   | 58.9 | -31.0      | -32.3      | -33.6      | -32.7           |
| <sup>3</sup> O <sub>2</sub> +H <sub>2</sub> S···(H <sub>2</sub> O) <sub>3</sub> a | 58.9 | -31.0      | -32.3      | -33.6      | -32.7           |

<sup>a</sup> ZPE values obtained at B3LYP/6-311+G(2df,2p) level of theory; The energy values are obtained at CCSD(T)/ 6-311++G(3df,2pd) level whereas the *H* and *G* corrections are taken from the B3LYP/6-311+G(2df,2p) level.

**Table S13** Equilibrium constants and concentration of water trimer-assisted the  $\text{H}_2\text{S} + {}^3\text{O}_2$  formation from the  $\text{HO}_2 + \text{HS}$  reaction within the temperature range of 240.0-425.0 K

| $T/\text{K}$                | $\text{K}_{\text{eq}}(\text{H}_2\text{O})_3$ | $[(\text{H}_2\text{O})_2]$ | $[\text{H}_2\text{O}]$     | $[(\text{H}_2\text{O})_3]$ |                        |
|-----------------------------|----------------------------------------------|----------------------------|----------------------------|----------------------------|------------------------|
| 240                         | 6.00E-20                                     | 3.00E+10                   | 8.29E+15                   | 1.49E+07                   |                        |
| 250                         | 2.95E-20                                     | 1.63E+11                   | 2.21E+16                   | 1.06E+08                   |                        |
| 278                         | 5.30E-21                                     | 8.99E+12                   | 2.25E+17                   | 1.07E+10                   |                        |
| 288                         | 3.12E-21                                     | 2.65E+13                   | 4.25E+17                   | 3.51E+10                   |                        |
| 298                         | 1.90E-21                                     | 7.18E+13                   | 7.64E+17                   | 1.04E+11                   |                        |
| 308                         | 1.20E-21                                     | 1.79E+14                   | 1.31E+18                   | 2.82E+11                   |                        |
| 325                         | 5.88E-22                                     | 7.54E+14                   | 3.04E+18                   | 1.35E+12                   |                        |
| 375                         | 1.06E-22                                     | 2.07E+16                   | 2.12E+19                   | 4.66E+13                   |                        |
| 425                         | 2.94E-23                                     | 2.26E+17                   | 8.56E+19                   | 5.69E+14                   |                        |
| $[(\text{H}_2\text{O})_3]=$ | $\text{K}_{\text{eq}}(\text{H}_2\text{O})_3$ | $\cdot$                    | $[(\text{H}_2\text{O})_2]$ | $\cdot$                    | $[\text{H}_2\text{O}]$ |

**Table S14** Rate constants and effective rate constants ( $\text{cm}^3 \cdot \text{molecules}^{-1} \cdot \text{s}^{-1}$ ) for the  $\text{H}_2\text{S} + {}^3\text{O}_2$  formations from the  $\text{HO}_2 + \text{HS}$  reaction occurring through  $\text{HO}_2 \cdots (\text{H}_2\text{O})_3$  ( $\text{HO}_2 \cdots (\text{H}_2\text{O})_{3a}$ ) + HS reactions within the temperature range of 240.0-425.0 K

| $T/\text{K}$ | $\text{Keq}(\text{TSWWW1})$ | $\text{Keq}(\text{TSWWW1a})$ | $k_{\text{TSWWW1}}$ | $k_{\text{TSWWW1a}}$ | $k_{\text{TSWWW2}}$ | $k_{\text{TSWWW2a}}$ |
|--------------|-----------------------------|------------------------------|---------------------|----------------------|---------------------|----------------------|
| 240          | 9.24E-26                    | 1.89E-25                     | 5.48E-18            | 7.31E-18             | 2.54E+08            | 1.05E+09             |
| 250          | 8.85E-26                    | 1.85E-25                     | 8.01E-18            | 2.10E-17             | 3.30E+08            | 1.32E+09             |
| 278          | 8.61E-26                    | 1.86E-25                     | 2.02E-17            | 3.57E-17             | 6.58E+08            | 2.40E+09             |
| 288          | 8.70E-26                    | 1.91E-25                     | 2.66E-17            | 4.78E-17             | 8.31E+08            | 2.94E+09             |
| 298          | 8.88E-26                    | 1.97E-25                     | 4.20E-17            | 7.05E-17             | 1.04E+09            | 3.57E+09             |
| 308          | 9.14E-26                    | 2.05E-25                     | 5.54E-17            | 9.78E-17             | 1.30E+09            | 4.33E+09             |
| 325          | 9.73E-26                    | 2.21E-25                     | 9.41E-17            | 1.90E-16             | 1.85E+09            | 5.90E+09             |
| 375          | 1.24E-25                    | 2.88E-25                     | 4.69E-16            | 7.11E-16             | 4.67E+09            | 1.33E+10             |
| 425          | 1.63E-25                    | 3.86E-25                     | 1.14E-15            | 2.43E-15             | 1.01E+10            | 2.65E+10             |

  

| $k_{\text{RWWW1}}$ | $k_{\text{RWWW1a}}$ | $\text{Keq}(\text{HO}_2 \cdots (\text{H}_2\text{O})_3)$ | $\text{Keq}(\text{HO}_2 \cdots (\text{H}_2\text{O})_{3a})$ | $[(\text{H}_2\text{O})_3]$ | $k'_{\text{RWWW1}}$ | $k'_{\text{RWWW1a}}$ |
|--------------------|---------------------|---------------------------------------------------------|------------------------------------------------------------|----------------------------|---------------------|----------------------|
| 5.48E-18           | 7.31E-18            | 7.84E-16                                                | 7.84E-16                                                   | 1.49E+07                   | 6.40E-26            | 8.54E-26             |
| 8.01E-18           | 2.10E-17            | 2.73E-16                                                | 2.73E-16                                                   | 1.06E+08                   | 2.32E-25            | 6.08E-25             |
| 2.02E-17           | 3.57E-17            | 2.14E-17                                                | 2.14E-17                                                   | 1.07E+10                   | 4.63E-24            | 8.19E-24             |
| 2.66E-17           | 4.78E-17            | 9.76E-18                                                | 9.76E-18                                                   | 3.51E+10                   | 9.12E-24            | 1.64E-23             |
| 4.20E-17           | 7.05E-17            | 4.70E-18                                                | 4.70E-18                                                   | 1.04E+11                   | 2.05E-23            | 3.44E-23             |
| 5.54E-17           | 9.78E-17            | 2.37E-18                                                | 2.37E-18                                                   | 2.82E+11                   | 3.71E-23            | 6.54E-23             |
| 9.41E-17           | 1.90E-16            | 8.20E-19                                                | 8.20E-19                                                   | 1.35E+12                   | 1.04E-22            | 2.10E-22             |
| 4.69E-16           | 7.11E-16            | 6.43E-20                                                | 6.43E-20                                                   | 4.66E+13                   | 1.40E-21            | 2.13E-21             |
| 1.14E-15           | 2.43E-15            | 9.40E-21                                                | 9.40E-21                                                   | 5.69E+14                   | 6.10E-21            | 1.30E-20             |

$\text{Keq}(\text{IMWWW1})$  and  $\text{Keq}(\text{IMWWW1a})$  is the equilibrium constant for the process of  $\text{HO}_2 \cdots (\text{H}_2\text{O})_3 + \text{HS} \rightarrow {}^3\text{IMWWW1}$  and  $\text{HO}_2 \cdots (\text{H}_2\text{O})_{3a} + \text{HS} \rightarrow {}^3\text{IMWWW1a}$ , respectively;  $k_{\text{TSWWW1}}$  and  $k_{\text{TSWWW1a}}$  is the rate constant for the process of  $\text{HO}_2 \cdots (\text{H}_2\text{O})_3 + \text{HS} \rightarrow {}^3\text{IMWWW1} \rightarrow {}^3\text{TSWWW1} \rightarrow {}^3\text{IMWWW2}$  and  $\text{HO}_2 \cdots (\text{H}_2\text{O})_{3a} + \text{HS} \rightarrow {}^3\text{IMWWW1a} \rightarrow {}^3\text{TSWWW1a} \rightarrow {}^3\text{IMWWW2a}$ , respectively;  $k_{\text{TSWWW2}}$  and  $k_{\text{TSWWW2a}}$  is the rate constant for the process of  ${}^3\text{IMWWW2} \rightarrow {}^3\text{TSWWW2} \rightarrow \text{H}_2\text{S} \cdots (\text{H}_2\text{O})_3 + {}^3\text{O}_2$  and  ${}^3\text{IMWWW2a} \rightarrow {}^3\text{TSWWW2a} \rightarrow \text{H}_2\text{S} \cdots (\text{H}_2\text{O})_{3a} + {}^3\text{O}_2$ , respectively;  $k_{\text{RWWW1}}$  and  $k_{\text{RWWW1a}}$  is the rate constant for the process of  $\text{HO}_2 \cdots (\text{H}_2\text{O})_3 + \text{HS} \rightarrow {}^3\text{IMWWW1} \rightarrow {}^3\text{TSWWW1} \rightarrow {}^3\text{IMWWW2} \rightarrow {}^3\text{TSWWW2} \rightarrow \text{H}_2\text{S} \cdots (\text{H}_2\text{O})_3 + {}^3\text{O}_2$  and  $\text{HO}_2 \cdots (\text{H}_2\text{O})_{3a} + \text{HS} \rightarrow {}^3\text{IMWWW1a} \rightarrow {}^3\text{TSWWW1a} \rightarrow {}^3\text{IMWWW2a} \rightarrow {}^3\text{TSWWW2a} \rightarrow \text{H}_2\text{S} \cdots (\text{H}_2\text{O})_{3a} + {}^3\text{O}_2$ , respectively;  $\text{Keq}(\text{HO}_2 \cdots (\text{H}_2\text{O})_3)$  is the equilibrium constant of  $\text{HO}_2 \cdots (\text{H}_2\text{O})_3$  complex;  $\text{Keq}(\text{HO}_2 \cdots (\text{H}_2\text{O})_{3a})$  is the equilibrium constant of  $\text{HO}_2 \cdots (\text{H}_2\text{O})_{3a}$  complex;  $[(\text{H}_2\text{O})_3]$  is the concentration of the water trimer;  $k'_{\text{RWWW1}}$  and  $k'_{\text{RWWW1a}}$  is the effective rate constant for the process of  $\text{HO}_2 \cdots (\text{H}_2\text{O})_3 + \text{HS} \rightarrow {}^3\text{IMWWW1} \rightarrow {}^3\text{TSWWW1} \rightarrow {}^3\text{IMWWW2} \rightarrow {}^3\text{TSWWW2} \rightarrow \text{H}_2\text{S} \cdots (\text{H}_2\text{O})_3 + {}^3\text{O}_2$  and  $\text{HO}_2 \cdots (\text{H}_2\text{O})_{3a} + \text{HS} \rightarrow {}^3\text{IMWWW1a} \rightarrow {}^3\text{TSWWW1a} \rightarrow {}^3\text{IMWWW2a} \rightarrow {}^3\text{TSWWW2a} \rightarrow \text{H}_2\text{S} \cdots (\text{H}_2\text{O})_{3a} + {}^3\text{O}_2$ , respectively; ( $1/k_{\text{RWWW1}} = 1/k_{\text{TSWWW1}} + 1/k_{\text{TSWWW2}}$ ,  $1/k_{\text{RWWW1a}} = 1/k_{\text{TSWWW1a}} + 1/k_{\text{TSWWW2a}}$ ,  $k'_{\text{RWWW1}} = k_{\text{RWWW1}} \cdot \text{Keq}(\text{HO}_2 \cdots (\text{H}_2\text{O})_3) \cdot [(\text{H}_2\text{O})_3]$ ,  $k'_{\text{RWWW1a}} = k_{\text{RWWW1a}} \cdot \text{Keq}(\text{HO}_2 \cdots (\text{H}_2\text{O})_{3a}) \cdot [(\text{H}_2\text{O})_3]$ )
